# Supplementary material for: Synthesis of optically active dihydropyrans from asymmetric [4 + 2] cycloaddition of β,γ-unsaturated α-ketoesters with allenic esters
Source: Royal Society of Chemistry journal article supplement (doi:10.1039/c2ob25475a), 2012-01-01
Supplement: c2ob25475a.pdf [file c2ob25475a.pdf]

## Supporting Information

### Synthesis of Optically Active Dihydropyrans from Asymmetric [4+2] Cycloaddition of $\beta,\gamma$ -Unsaturated $\alpha$ -Ketoesters with Allenic Esters

Cheng-Kui Pei,<sup>a</sup> Yu Jiang<sup>a</sup> and Min Shi<sup>a,b\*</sup>

<sup>a</sup>Key Laboratory for Advanced Materials and Institute of Fine Chemicals, East China University of Science and Technology, 130 Mei Long Road, Shanghai 200237 China.

<sup>b</sup>State Key Laboratory of Organometallic Chemistry, Shanghai Institute of Organic Chemistry, Chinese Academy of Sciences, 354 Fenglin Lu, Shanghai 200032 China.  
[Mshi@mail.sioc.ac.cn](mailto:Mshi@mail.sioc.ac.cn). Fax: 86-21-64166128

#### CONTENTS

|                                                |     |
|------------------------------------------------|-----|
| 1. General Remarks                             | S2  |
| 2. General Procedure and Data of Adducts       | S3  |
| 3. Chiral HPLC traces of the products <b>3</b> | S26 |
| 4. X-ray Crystal Data of <b>3na</b>            | S62 |
| 5. Reference                                   | S63 |

**General Remarks:**  $^1\text{H}$  NMR spectra were recorded on a Bruker AM-300 or AM-400 spectrometer for solution in  $\text{CDCl}_3$  with tetramethylsilane (TMS) as internal standard; J-values are in Hz. Mass spectra were recorded with a HP-5989 instrument. All of the compounds reported in this paper gave satisfactory HRMS analytic data. Melting points were determined on a digital melting point apparatus and temperatures were uncorrected. Infrared spectra were recorded on a Perkin-Elmer PE-983 spectrometer with absorption in  $\text{cm}^{-1}$ . Optical rotations were determined at 589 nm (sodium D line) by using a Perkin-Elmer-341 MC digital polarimeter;  $[\alpha]_{\text{D}}$ -values are given in unit of  $10 \text{ deg}^{-1} \text{ cm}^2 \text{ g}^{-1}$ . Chiral HPLC was performed on a SHIMADZU SPD-10A vp series with chiral columns (Chiralpak AD-H, IC-H columns  $4.6 \times 250 \text{ mm}$ , (Daicel Chemical Ind., Ltd.)). THF, toluene and  $\text{Et}_2\text{O}$  were distilled from sodium (Na) under argon (Ar) atmosphere.  $\text{CH}_3\text{CN}$ , 1,2-dichloroethane and dichloromethane were distilled from  $\text{CaH}_2$  under argon (Ar) atmosphere. Commercially obtained reagents were used without further purification. All reactions were monitored by TLC with Huanghai GF254 silica gel coated plates. Flash column chromatography was carried out using 300-400 mesh silica gel at increased pressure. All  $\beta,\gamma$ -unsaturated  $\alpha$ -ketoesters were prepared according to the literature.<sup>1</sup> The cinchona alkaloid derivatives catalysts were prepared according to the literature.<sup>2</sup>

### General Procedure and Data of Adducts 3

Under argon atmosphere, allenates **2** (0.12 mmol) was added to a solution of  $\beta,\gamma$ -unsaturated  $\alpha$ -ketoesters **1** (0.1 mmol),  $\beta$ -ICD (0.02 mmol) in flourobenezene (3.0 mL) and stirred at  $-15$  °C or room temperature for 24 h. The solvent was removed under reduced pressure and residue was chromatographed on silica gel (elution with petroleum ether/EtOAc = 8:1-4:1) to provide compound **3**.

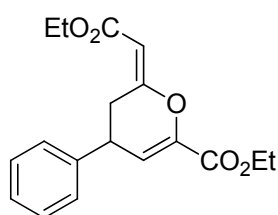

(*E*)-Ethyl 2-(2-ethoxy-2-oxoethylidene)-4-phenyl-3,4-dihydro-2H-pyran-6-carboxylate **3aa**: a slight yellow liquid (28.4 mg, 90%); This is a known compound;<sup>3</sup>  $^1\text{H}$  NMR ( $\text{CDCl}_3$ , 400 MHz, TMS)  $\delta$  1.23 (t,  $J = 7.2$  Hz, 3H), 1.34 (t,  $J = 7.2$  Hz, 3H), 3.11 (dd,  $J = 8.0$  Hz, 4.8 Hz, 1H), 3.68-3.72 (m, 2H), 4.07-4.14 (m, 2H), 4.28-4.34 (m, 2H), 5.75 (s, 1H), 6.45 (d,  $J = 4.8$  Hz, 1H), 7.20-7.22 (m, 2H), 7.26-7.28 (m, 1H), 7.31-7.35 (m, 2H);  $[\alpha]_D^{20} = -76.5$  (c 1.00,  $\text{CH}_2\text{Cl}_2$ ) (85% ee); Chiralcel AD-H, hexane/ $^i\text{PrOH}$  = 80/20, 0.6 mL/min, 254 nm,  $t_{\text{major}} = 7.97$  min,  $t_{\text{minor}} = 7.35$  min.

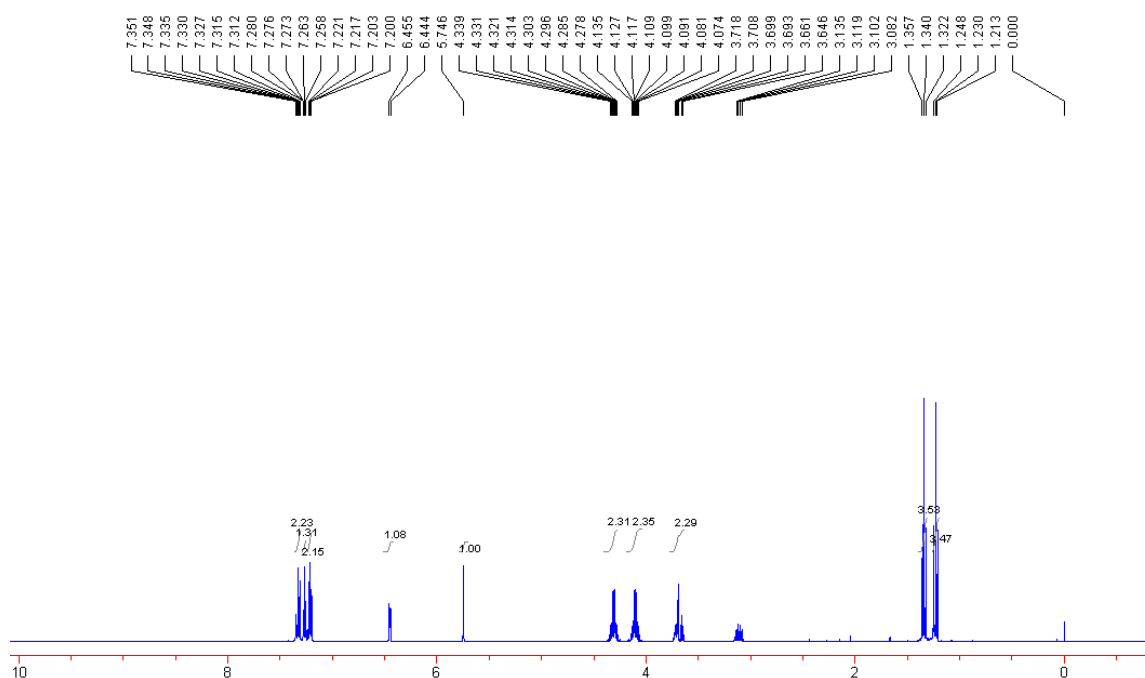

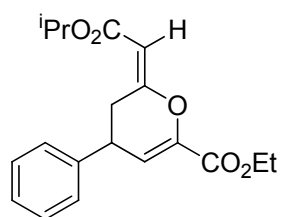

(*E*)-ethyl 2-(2-isopropoxy-2-oxoethylidene)-4-phenyl-3,4-dihydro-2*H*-pyran-6-carboxylate

**3ab**: a slight yellow liquid (26.4 mg, 80%);  $^1\text{H}$  NMR ( $\text{CDCl}_3$ , 400 MHz, TMS)  $\delta$  1.19 (d,  $J = 6.4$  Hz, 3H), 1.21 (d,  $J = 6.4$  Hz, 3H), 1.34 (t,  $J = 7.2$  Hz, 3H), 3.09 (dd,  $J = 14.4$  Hz, 7.2 Hz, 1H), 3.64-3.74 (m, 2H), 4.28-4.35 (m, 2H), 4.97 (sept,  $J = 6.4$  Hz, 1H), 5.72 (s, 1H), 6.46 (d,  $J = 4.4$  Hz, 1H), 7.20-7.22 (m, 2H), 7.26-7.28 (m, 1H), 7.31-7.35 (m, 2H);  $^{13}\text{C}$  NMR ( $\text{CDCl}_3$ , 100 MHz, TMS)  $\delta$  14.1, 21.8, 29.7, 35.9, 61.6, 67.1, 101.5, 116.4, 127.2, 127.3, 128.8, 141.4, 141.8, 161.2, 164.3, 166.4; IR ( $\text{CH}_2\text{Cl}_2$ )  $\nu$  3063, 3029, 2984, 2937, 1727, 1694, 1667, 1607, 1576, 1496, 1450, 1376, 1261, 1078, 982, 917, 848, 820, 742, 688, 636, 570  $\text{cm}^{-1}$ ; MS (ESI)  $m/z$  353.0 ( $\text{M}+\text{Na}^+$ ); HRMS (ESI) Calcd. for  $\text{C}_{19}\text{H}_{22}\text{O}_5\text{Na}$  requires ( $\text{M}+\text{Na}^+$ ): 353.1359, Found: 353.1360;  $[\alpha]_D^{20} = -57$  (c 0.30,  $\text{CH}_2\text{Cl}_2$ ) (77% ee); Chiralcel AD-H, hexane/*i*PrOH = 90/10, 0.6 mL/min, 254 nm,  $t_{\text{major}} = 10.06$  min,  $t_{\text{minor}} = 8.98$  min.

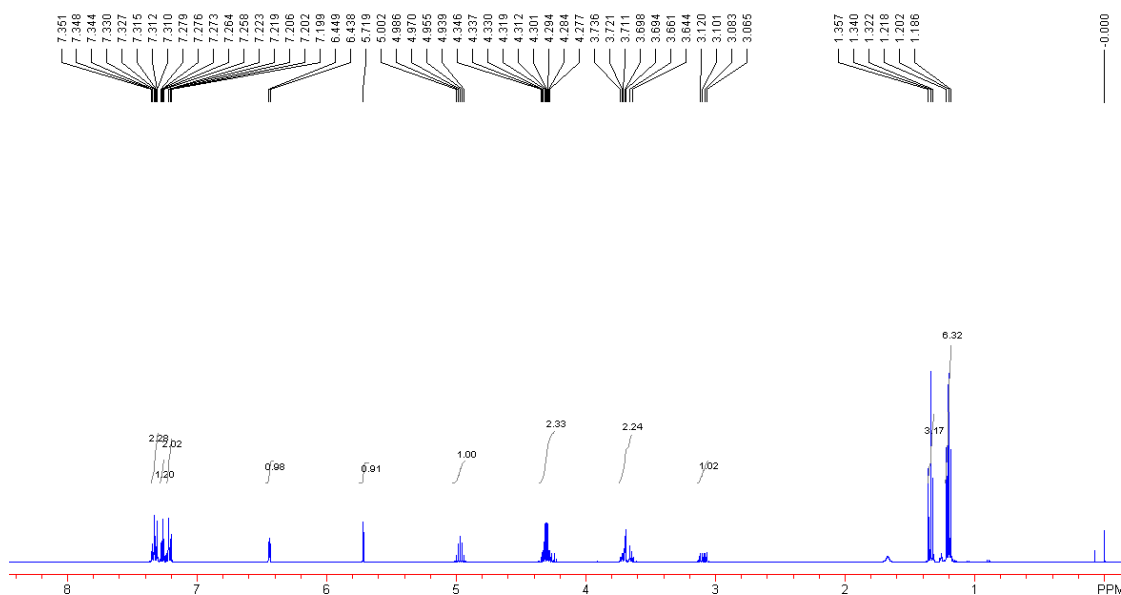

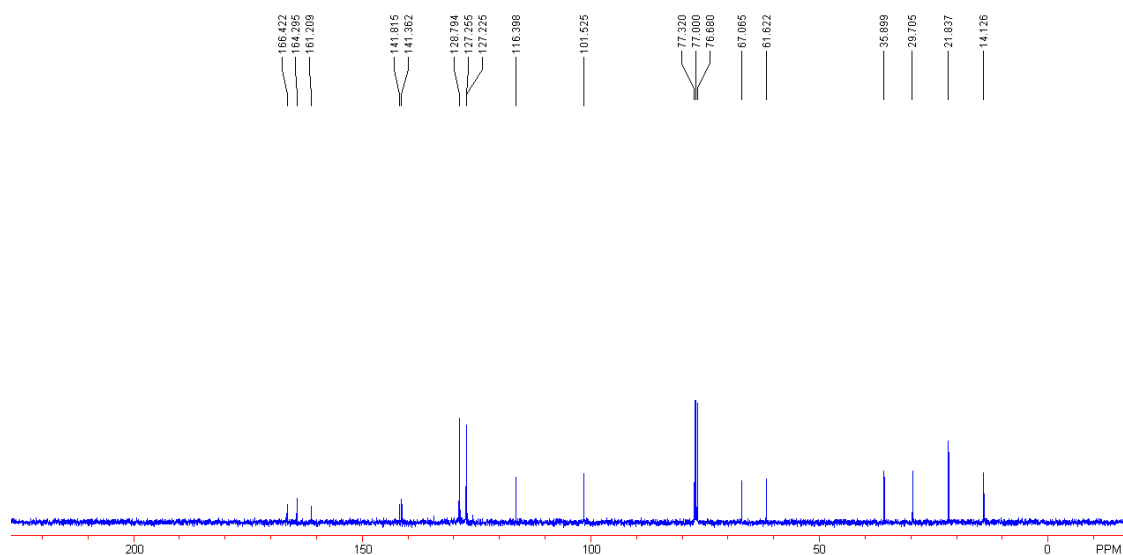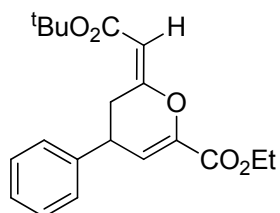

(*E*)-ethyl 2-(2-(tert-butoxy)-2-oxoethylidene)-4-phenyl-3,4-dihydro-2*H*-pyran-6-carboxylate **3ac**: a slight yellow liquid (26.8 mg, 78%); <sup>1</sup>H NMR (CDCl<sub>3</sub>, 400 MHz, TMS) δ 1.34 (t, *J* = 7.2 Hz, 3H), 1.42 (s, 9H), 3.01 (dd, *J* = 17.6 Hz, 11.2 Hz, 1H), 3.65-3.73 (m, 2H), 4.25-4.33 (m, 2H), 5.68 (s, 1H), 6.42 (d, *J* = 3.6 Hz, 1H), 7.20-7.23 (m, 2H), 7.26-7.27 (m, 1H), 7.31-7.35 (m, 2H); <sup>13</sup>C NMR (CDCl<sub>3</sub>, 100 MHz, TMS) δ 14.1, 28.2, 29.6, 36.0, 61.6, 80.0, 102.8, 116.3, 127.2, 127.3, 128.8, 141.5, 141.8, 161.3, 163.5, 166.3; IR (CH<sub>2</sub>Cl<sub>2</sub>) ν 2979, 2932, 2359, 2342, 1736, 1702, 1655, 1455, 1393, 1370, 1255, 1159, 1114, 862, 759, 700 cm<sup>-1</sup>; MS (ESI) *m/z* 367.1 (M+Na<sup>+</sup>); HRMS (ESI) Calcd. for C<sub>20</sub>H<sub>24</sub>O<sub>5</sub>Na requires (M+Na<sup>+</sup>): 367.1516, Found: 367.1516; [α]<sub>D</sub><sup>20</sup> = -114.5 (c 0.90, CH<sub>2</sub>Cl<sub>2</sub>) (83% ee); Chiralcel AD-H, hexane/<sup>i</sup>PrOH = 90/10, 0.6 mL/min, 254 nm, *t*<sub>major</sub> = 12.96 min, *t*<sub>minor</sub> = 11.77 min.

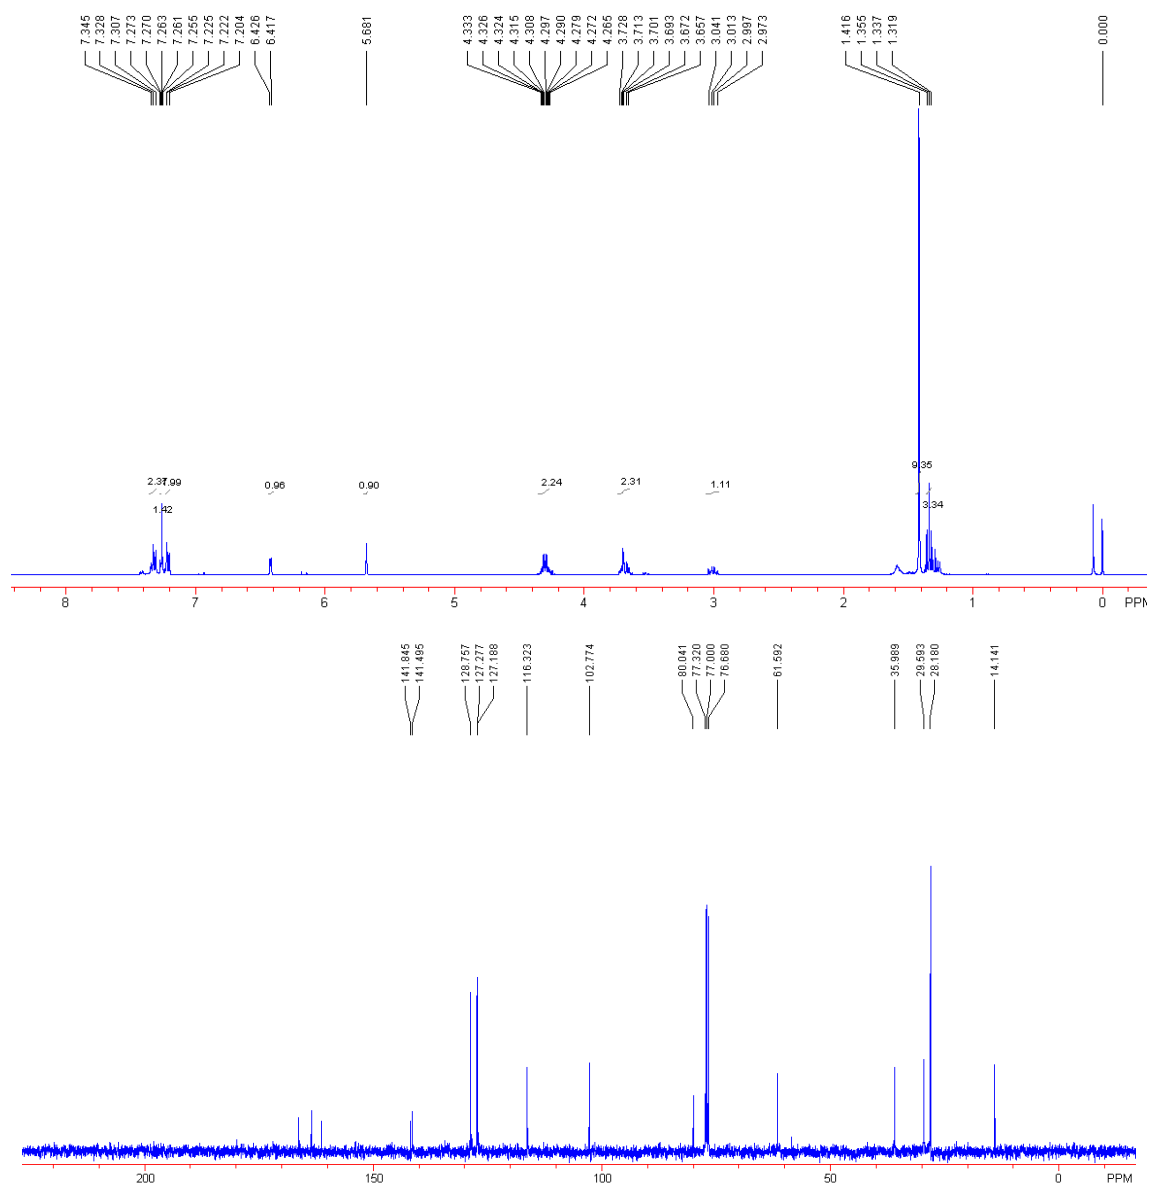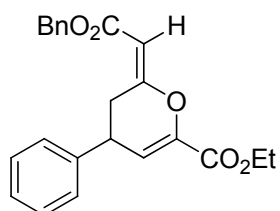

(*E*)-ethyl 2-(2-(benzyloxy)-2-oxoethylidene)-4-phenyl-3,4-dihydro-2*H*-pyran-6-carboxylate **3ad**: a slight yellow liquid (28.7 mg, 76%); <sup>1</sup>H NMR (CDCl<sub>3</sub>, 400 MHz, TMS) δ 1.34 (t, *J* = 7.2 Hz, 3H), 3.13 (dd, *J* = 14.8 Hz, 7.6 Hz, 1H), 3.64-3.73 (m, 2H), 4.28-4.34 (m, 2H), 5.09 (d, *J* = 12.8 Hz, 1H), 5.13 (d, *J* = 12.8 Hz, 1H), 5.82 (s, 1H), 6.46 (d, *J* = 4.8 Hz, 1H), 7.19-7.21 (m, 2H), 7.26-7.28 (m, 1H), 7.30-7.35 (m, 7H); <sup>13</sup>C NMR (CDCl<sub>3</sub>, 100 MHz, TMS) δ 14.1,

29.8, 35.8, 61.7, 65.6, 100.6, 116.6, 127.2, 127.3, 127.9, 128.0, 128.5, 128.8, 136.2, 141.2, 141.7, 161.1, 165.2, 166.7; IR (CH<sub>2</sub>Cl<sub>2</sub>)  $\nu$  3060, 3035, 1732, 1694, 1612, 1575, 1450, 1320, 1307, 1261, 1205, 1089, 996, 904, 746, 697 cm<sup>-1</sup>; MS (ESI)  $m/z$  401.0 (M+Na<sup>+</sup>); HRMS (ESI) Calcd. for C<sub>23</sub>H<sub>22</sub>O<sub>5</sub>Na requires (M+Na<sup>+</sup>): 401.1359, Found: 401.1353;  $[\alpha]_D^{20} = -131.0$  (c 1.70, CH<sub>2</sub>Cl<sub>2</sub>) (83% ee); Chiralcel AD-H, hexane/<sup>i</sup>PrOH = 98/2, 0.6 mL/min, 254 nm,  $t_{\text{major}} = 21.53$  min,  $t_{\text{minor}} = 17.49$  min.

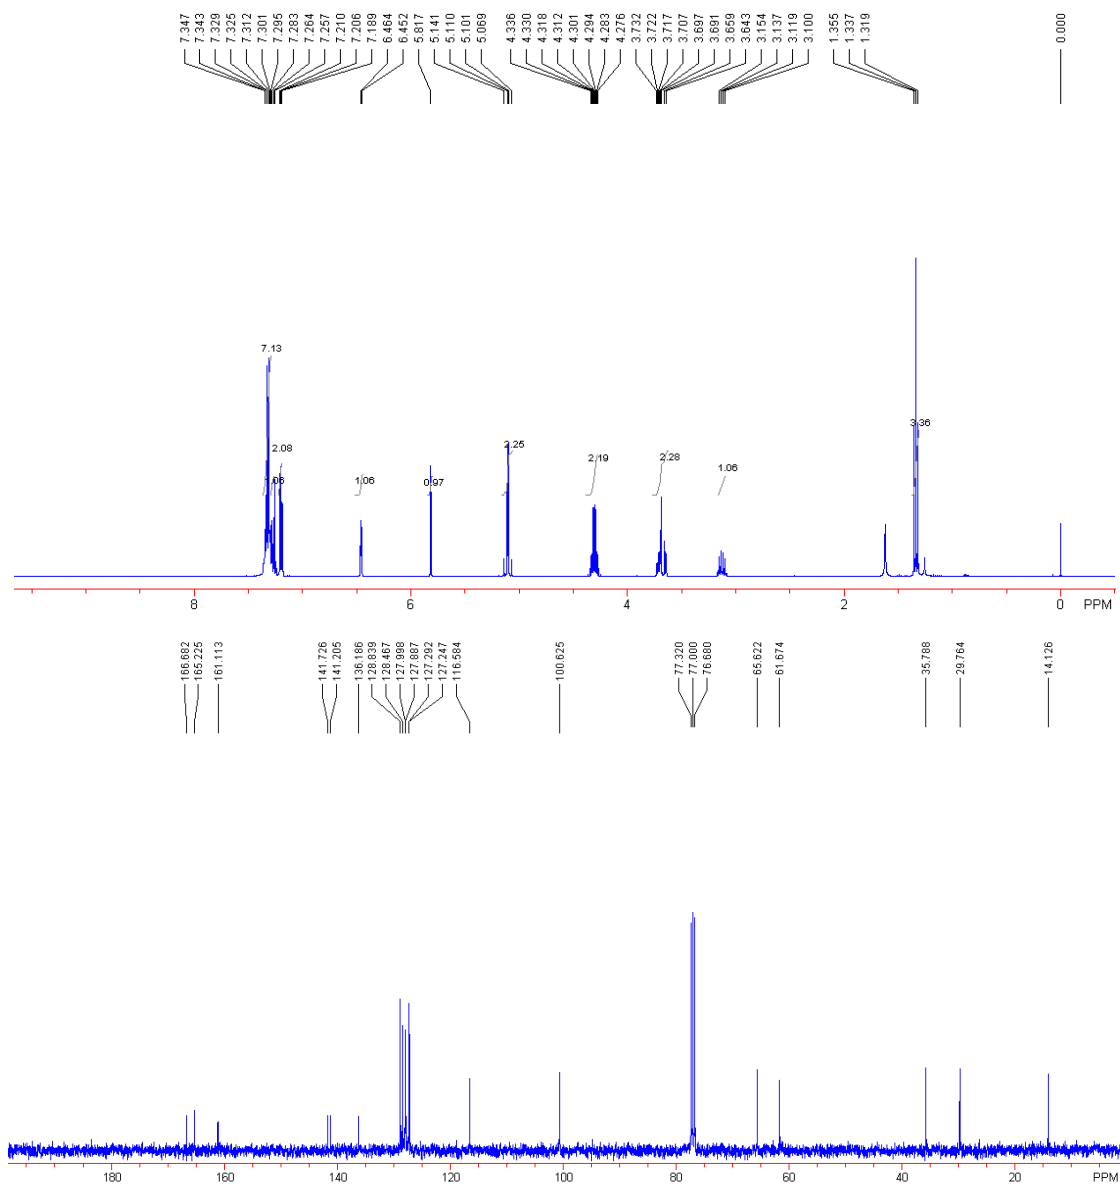

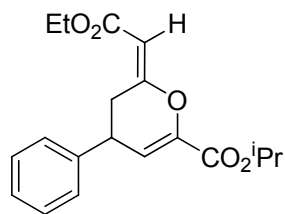

(*E*)-isopropyl 2-(2-ethoxy-2-oxoethylidene)-4-phenyl-3,4-dihydro-2*H*-pyran-6-carboxylate  
**3ba**: a slight yellow liquid (37.0 mg, 90%); <sup>1</sup>H NMR (CDCl<sub>3</sub>, 400 MHz, TMS) δ 1.23 (t, *J* = 7.2 Hz, 3H), 1.32 (d, *J* = 6.0 Hz, 6H), 3.11 (dd, *J* = 13.6 Hz, 6.8 Hz, 1H), 3.64-3.71 (m, 2H), 4.08-4.14 (m, 2H), 5.16 (sept, *J* = 6.0 Hz, 1H), 5.75 (s, 1H), 6.41 (d, *J* = 4.0 Hz, 1H), 7.20-7.22 (m, 2H), 7.26-7.28 (m, 1H), 7.31-7.33 (m, 2H); <sup>13</sup>C NMR (CDCl<sub>3</sub>, 100 MHz, TMS) δ 14.2, 21.7, 29.7, 35.9, 59.8, 69.4, 100.9, 116.2, 127.25, 127.29, 128.8, 141.4, 142.0, 160.7, 164.7, 167.0; IR (CH<sub>2</sub>Cl<sub>2</sub>) ν 2984, 2937, 1727, 1694, 1667, 1607, 1576, 1496, 1450, 1376, 1261, 1078, 982, 917, 848, 820, 742, 688, 636, 570 cm<sup>-1</sup>; MS (ESI) *m/z* 331.0 (M+H<sup>+</sup>); HRMS (MALDI) Calcd. for C<sub>19</sub>H<sub>22</sub>O<sub>5</sub>Na requires (M+Na<sup>+</sup>): 353.1360, Found: 353.1371; [α]<sub>D</sub><sup>20</sup> = -205.1 (c 1.35, CH<sub>2</sub>Cl<sub>2</sub>) (86% ee); Chiralcel AD-H, hexane/<sup>i</sup>PrOH = 95/5, 0.6 mL/min, 254 nm, *t*<sub>major</sub> = 12.14 min, *t*<sub>minor</sub> = 11.38 min.

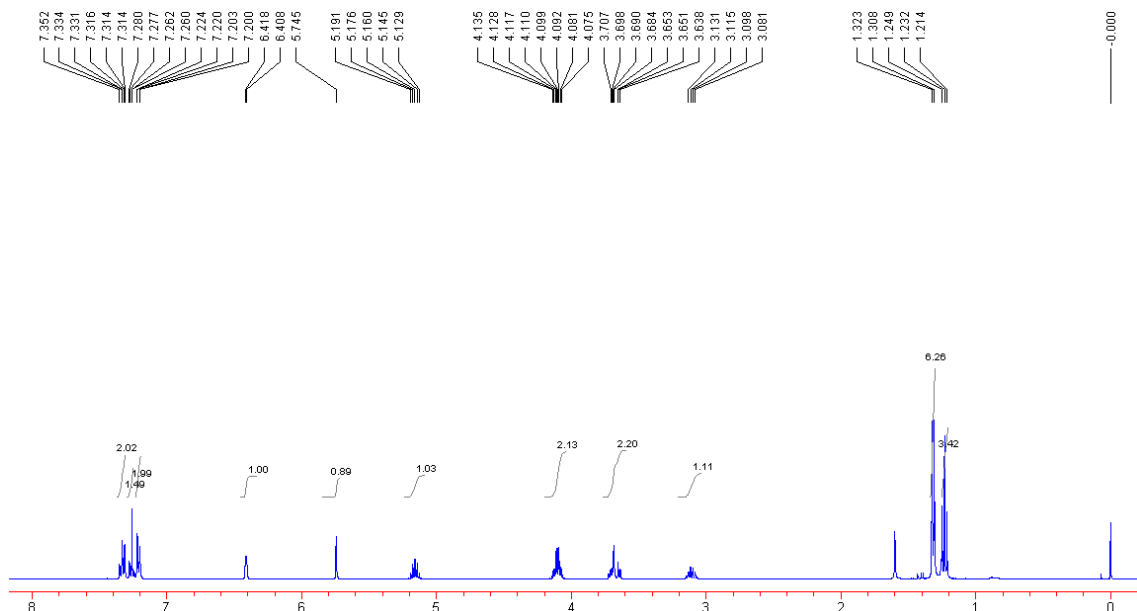



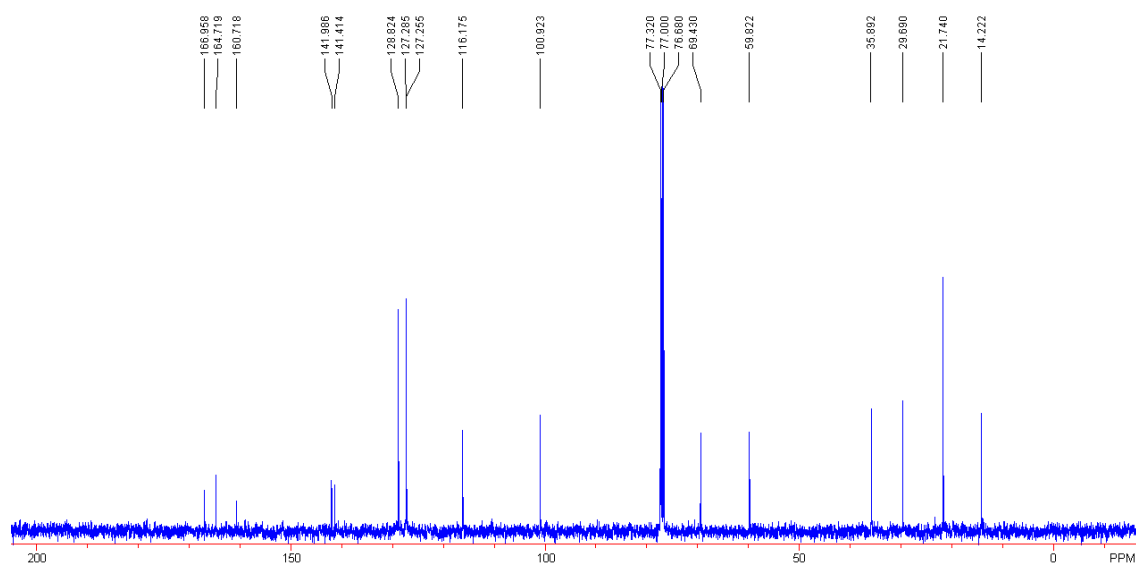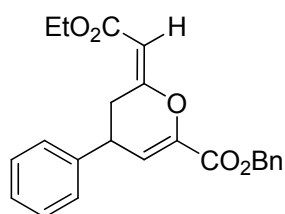

(*E*)-benzyl 2-(2-ethoxy-2-oxoethylidene)-4-phenyl-3,4-dihydro-2*H*-pyran-6-carboxylate **3ca**: a slight yellow liquid (34.0 mg, 90%);  $^1\text{H}$  NMR ( $\text{CDCl}_3$ , 400 MHz, TMS)  $\delta$  1.23 (t,  $J = 7.2$  Hz, 3H), 3.11 (dd,  $J = 13.6$  Hz, 6.8 Hz, 1H), 3.63-3.71 (m, 2H), 4.07-4.13 (m, 2H), 5.25 (d,  $J = 12.4$  Hz, 1H), 5.31 (d,  $J = 12.4$  Hz, 1H), 5.74 (s, 1H), 6.48 (d,  $J = 3.2$  Hz, 1H), 7.18-7.20 (m, 2H), 7.23-7.27 (m, 1H), 7.30-7.39 (m, 7H);  $^{13}\text{C}$  NMR ( $\text{CDCl}_3$ , 100 MHz, TMS)  $\delta$  14.2, 29.7, 35.9, 59.8, 67.2, 101.0, 117.0, 127.2, 128.4, 128.5, 128.6, 128.8, 135.2, 141.2, 141.6, 161.0, 164.5, 166.9; IR ( $\text{CH}_2\text{Cl}_2$ )  $\nu$  2359, 2342, 1734, 1716, 1654, 1276, 1260, 1168, 1116, 750, 668  $\text{cm}^{-1}$ ; MS (ESI)  $m/z$  401.0 ( $\text{M}+\text{Na}^+$ ); HRMS (ESI) Calcd. for  $\text{C}_{23}\text{H}_{22}\text{O}_5\text{Na}$  requires ( $\text{M}+\text{Na}^+$ ): 401.1359, Found: 401.1353;  $[\alpha]_{\text{D}}^{20} = -112.3$  (c 0.40,  $\text{CH}_2\text{Cl}_2$ ) (84% ee); Chiralcel AD-H, hexane/ $^i\text{PrOH} = 90/10$ , 0.7 mL/min, 254 nm,  $t_{\text{major}} = 14.58$  min,  $t_{\text{minor}} = 13.68$  min.

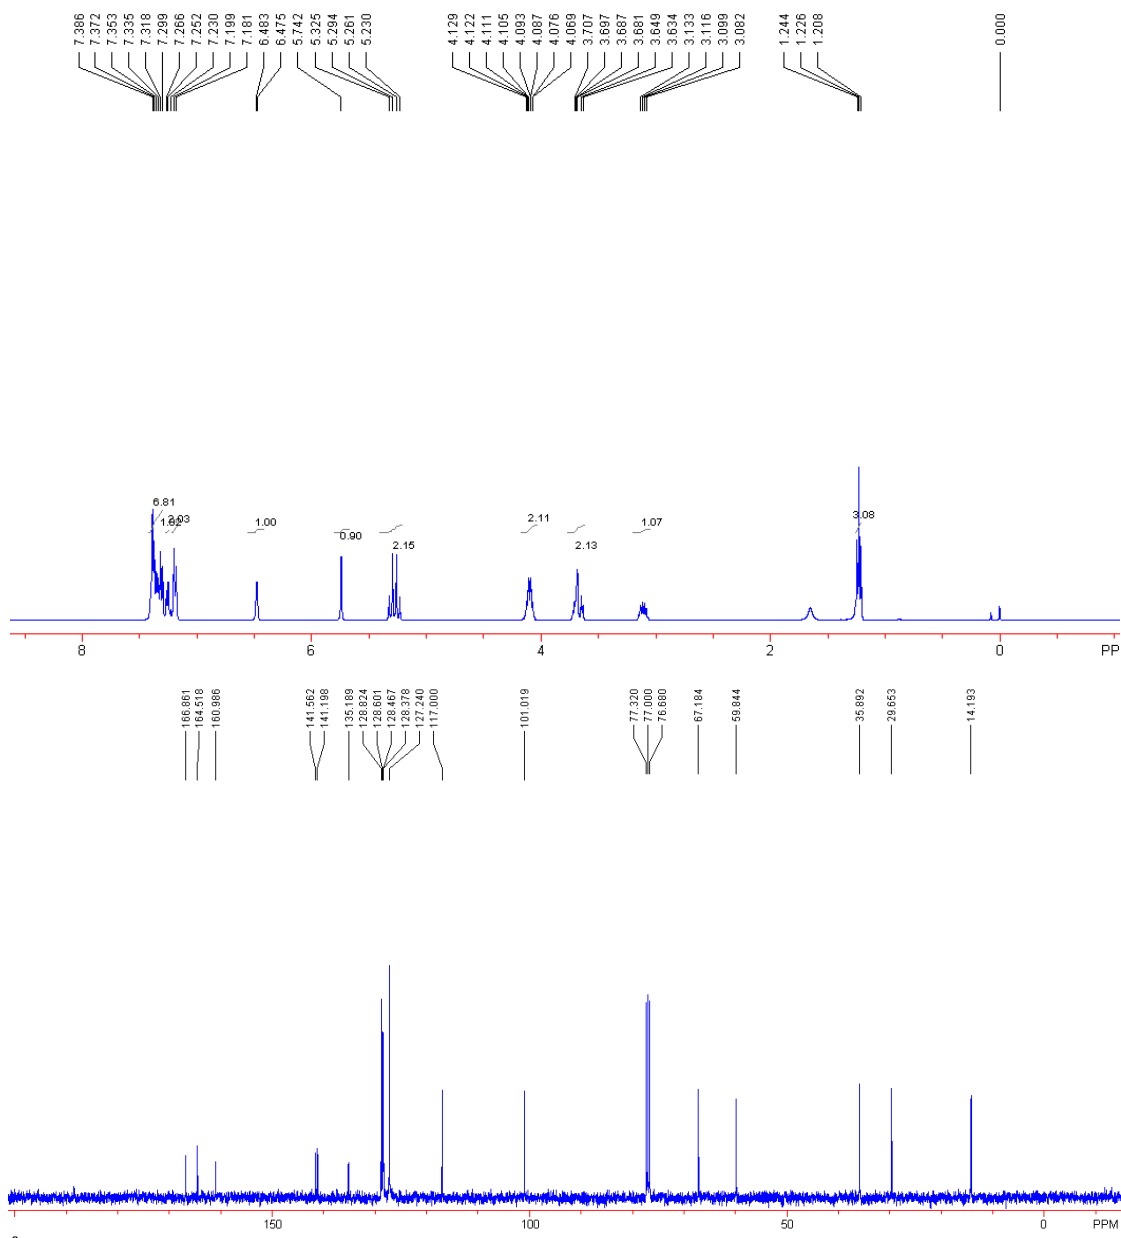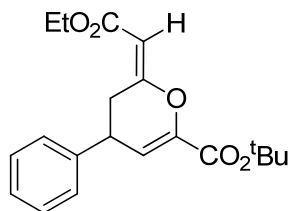

(*E*)-*tert*-butyl 2-(2-ethoxy-2-oxoethylidene)-4-phenyl-3,4-dihydro-2*H*-pyran-6-carboxylate  
**3da**: a slight yellow liquid (29.2 mg, 85%); <sup>1</sup>H NMR (CDCl<sub>3</sub>, 400 MHz, TMS) δ 1.23 (t, *J* = 7.2 Hz, 3H), 1.53 (s, 9H), 3.11 (dd, *J* = 13.2 Hz, 6.4 Hz, 1H), 3.62-3.71 (m, 2H), 4.07-4.13 (m, 2H), 5.73 (s, 1H), 6.34 (d, *J* = 3.2 Hz, 1H), 7.10-7.22 (m, 2H), 7.26-7.28 (m, 1H), 7.32-7.35 (m, 2H); <sup>13</sup>C NMR (CDCl<sub>3</sub>, 100 MHz, TMS) δ 14.2, 28.0, 29.7, 35.8, 59.8, 82.4, 100.7, 115.5,

127.2, 127.3, 128.8, 141.5, 142.4, 161.2, 164.9, 167.0; IR (CH<sub>2</sub>Cl<sub>2</sub>) v 2928, 2360, 2342, 1792, 1772, 1733, 1716, 1647, 1541, 1473, 1373, 1339, 1259, 1164, 1116, 750, 669 cm<sup>-1</sup>; MS (ESI) *m/z* 345.1 (M+H<sup>+</sup>); HRMS (MALDI) Calcd. for C<sub>20</sub>H<sub>24</sub>O<sub>5</sub>Na requires (M+Na<sup>+</sup>): 367.1516, Found: 367.1515; [α]<sub>D</sub><sup>20</sup> = -214.4 (c 1.50, CH<sub>2</sub>Cl<sub>2</sub>) (90% ee); Chiralcel IC, hexane/*i*PrOH = 95/5, 0.6 mL/min, 254 nm, *t*<sub>major</sub> = 18.45 min, *t*<sub>minor</sub> = 18.42 min.

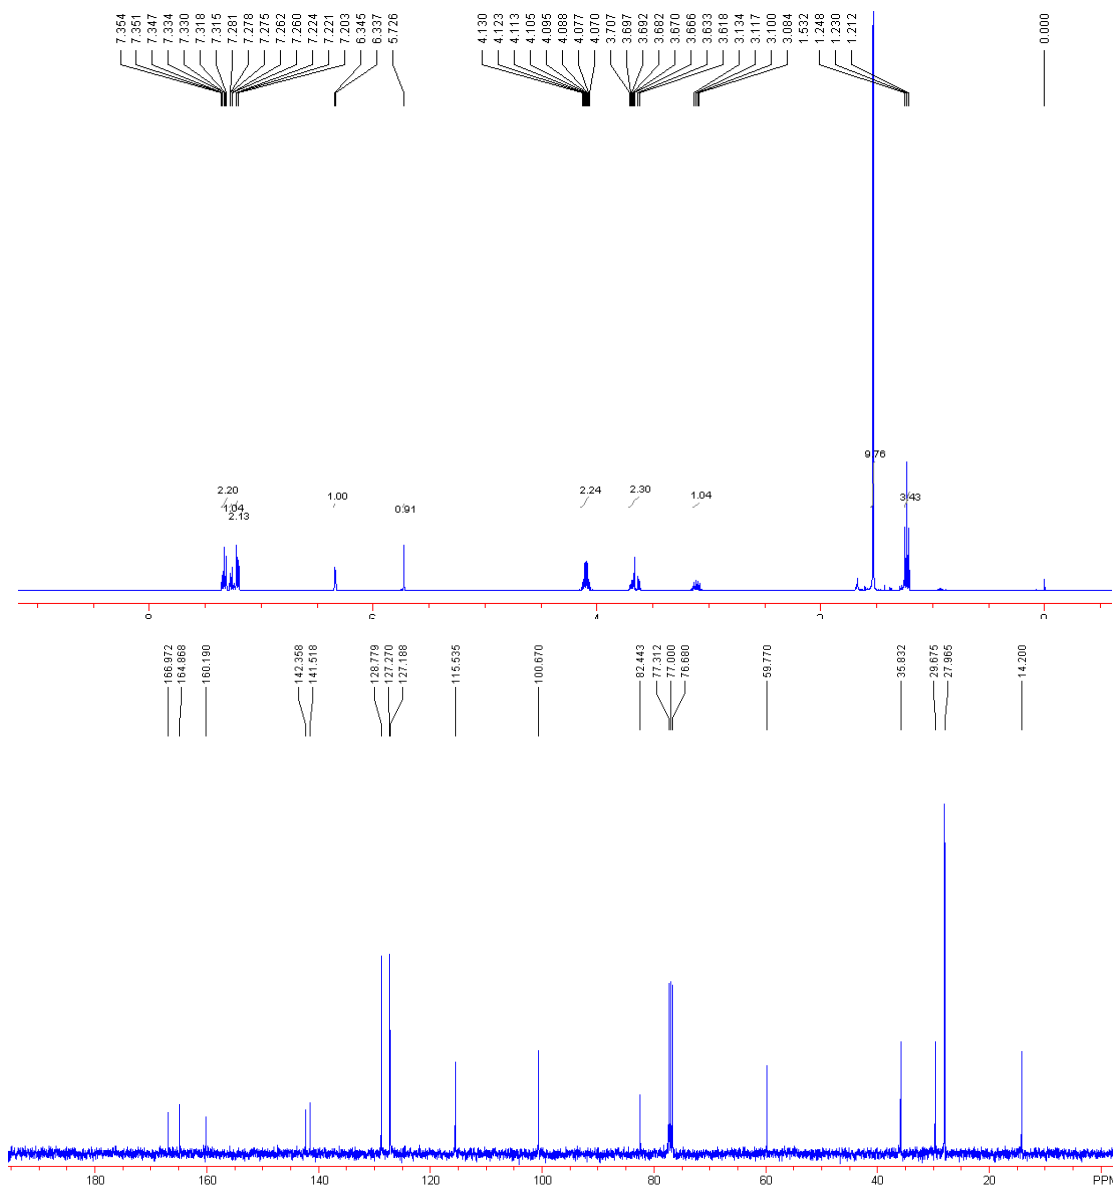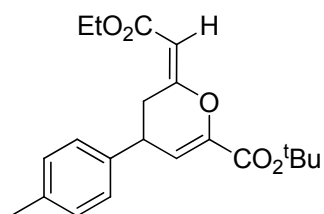

(*E*)-*tert*-butyl 2-(2-ethoxy-2-oxoethylidene)-4-(*p*-tolyl)-3,4-dihydro-2*H*-pyran-6-carboxylate  
**3ea**: a slight yellow liquid (32.4 mg, 90%); <sup>1</sup>H NMR (CDCl<sub>3</sub>, 400 MHz, TMS) δ 1.23 (t, *J* = 7.2 Hz, 3H), 1.53 (s, 9H), 2.33 (s, 3H), 3.08 (dd, *J* = 13.2 Hz, 6.4 Hz, 1H), 3.59-3.67 (m, 2H), 4.06-4.14 (m, 2H), 5.72 (s, 1H), 6.32 (d, *J* = 3.2 Hz, 1H), 7.10 (d, *J* = 8.4 Hz, 2H), 7.14 (d, *J* = 8.4 Hz, 2H); <sup>13</sup>C NMR (CDCl<sub>3</sub>, 100 MHz, TMS) δ 14.2, 21.0, 28.0, 29.7, 35.4, 59.8, 82.4, 100.6, 115.9, 127.1, 129.4, 136.8, 138.5, 142.2, 160.2, 165.0, 167.0; IR (CH<sub>2</sub>Cl<sub>2</sub>) ν 2980, 2932, 2359, 1732, 1716, 1659, 1515, 1394, 1371, 1259, 1165, 1117, 1046, 848, 758, 750 cm<sup>-1</sup>; MS (ESI) *m/z* 359.1 (M+H<sup>+</sup>); HRMS (MALDI) Calcd. for C<sub>21</sub>H<sub>26</sub>O<sub>5</sub>Na requires (M+Na<sup>+</sup>): 381.1673, Found: 381.1671; [α]<sub>D</sub><sup>20</sup> = -228.0 (c 1.65, CH<sub>2</sub>Cl<sub>2</sub>) (90% ee); Chiralcel IC, hexane/<sup>i</sup>PrOH = 95/5, 0.6 mL/min, 254 nm, *t*<sub>major</sub> = 15.77 min, *t*<sub>minor</sub> = 14.80 min.

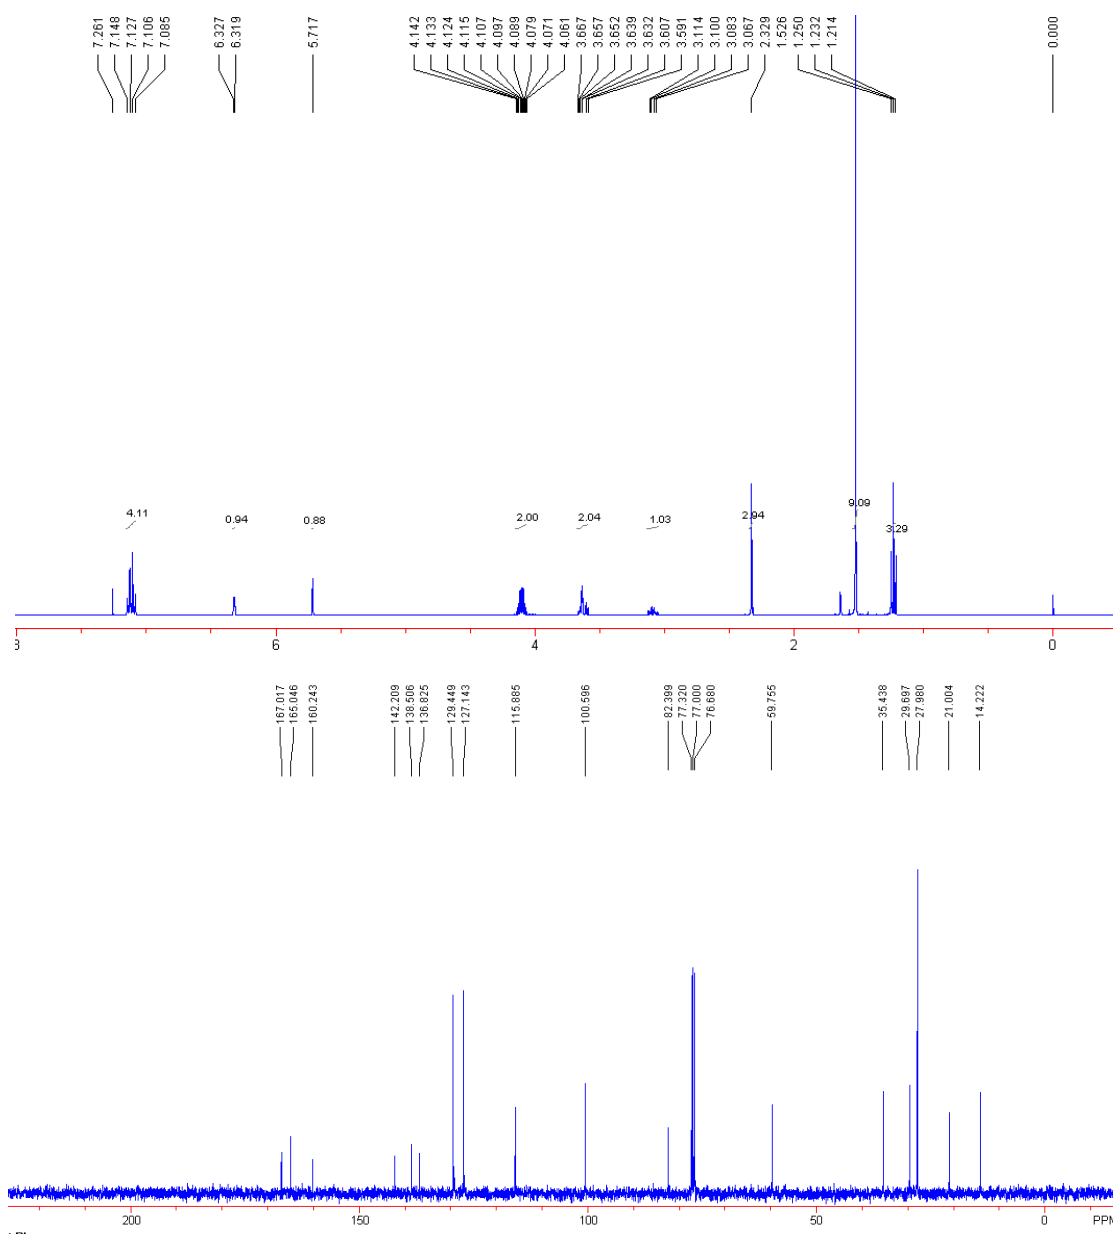

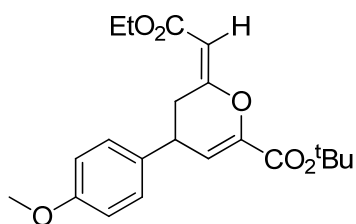

(*E*)-*tert*-butyl

2-(2-ethoxy-2-oxoethylidene)-4-(4-methoxyphenyl)-3,4-dihydro-2*H*-pyran-6-carboxylate **3fa**: a slight yellow liquid (33.1 mg, 89%);  $^1\text{H}$  NMR ( $\text{CDCl}_3$ , 400 MHz, TMS)  $\delta$  1.23 (t,  $J = 7.2$  Hz, 3H), 1.53 (s, 9H), 3.13 (dd,  $J = 14.8$  Hz, 8.0 Hz, 1H), 3.57 (dd,  $J = 14.8$  Hz, 6.4 Hz, 1H), 3.62-3.66 (m, 1H), 3.79 (s, 3H), 4.07-4.13 (m, 2H), 5.72 (s, 1H), 6.32 (d,  $J = 4.0$  Hz, 1H), 6.86 (d,  $J = 8.8$  Hz, 2H), 7.13 (d,  $J = 8.8$  Hz, 2H);  $^{13}\text{C}$  NMR ( $\text{CDCl}_3$ , 100 MHz, TMS)  $\delta$  14.2, 28.0, 29.8, 35.0, 55.2, 59.8, 82.4, 100.6, 114.1, 115.9, 128.3, 133.5, 142.2, 158.7, 160.3, 165.0, 167.0; IR ( $\text{CH}_2\text{Cl}_2$ )  $\nu$  2978, 2359, 2342, 1733, 1716, 1654, 1647, 1509, 1457, 1370, 1258, 1164, 1114, 1039, 750, 669  $\text{cm}^{-1}$ ; MS (ESI)  $m/z$  375.1 ( $\text{M}+\text{H}^+$ ); HRMS (MALDI) Calcd. for  $\text{C}_{21}\text{H}_{26}\text{O}_6\text{Na}$  requires ( $\text{M}+\text{Na}^+$ ): 397.1622, Found: 397.1627;  $[\alpha]_D^{20} = -184.4$  (c 1.45,  $\text{CH}_2\text{Cl}_2$ ) (87% ee); Chiralcel AS-H, hexane/ $^i\text{PrOH} = 95/5$ , 0.6 mL/min, 254 nm,  $t_{\text{major}} = 10.79$  min,  $t_{\text{minor}} = 9.49$  min.

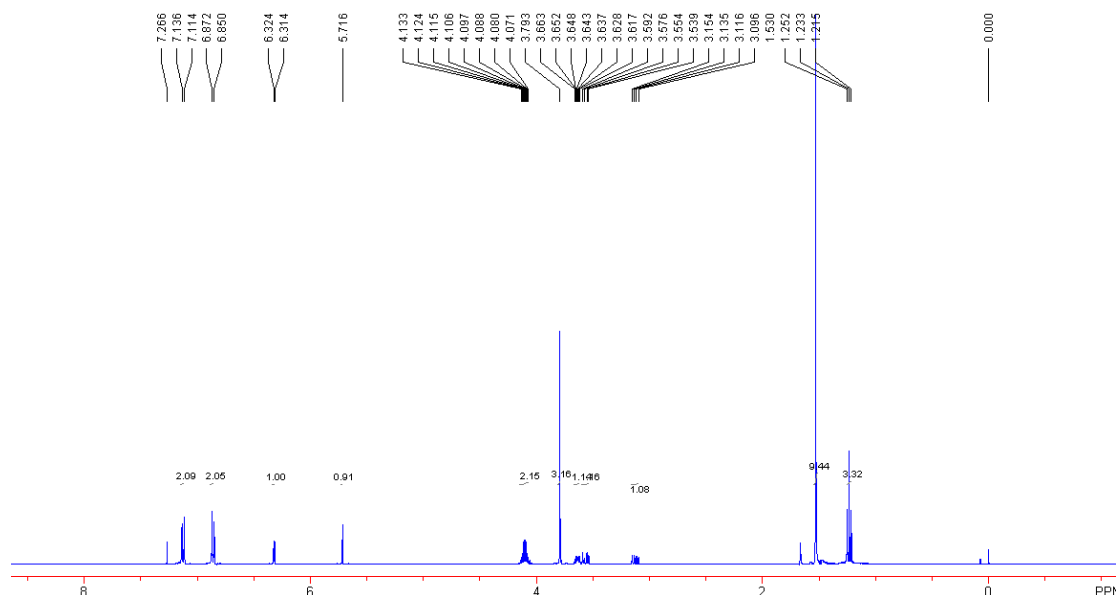

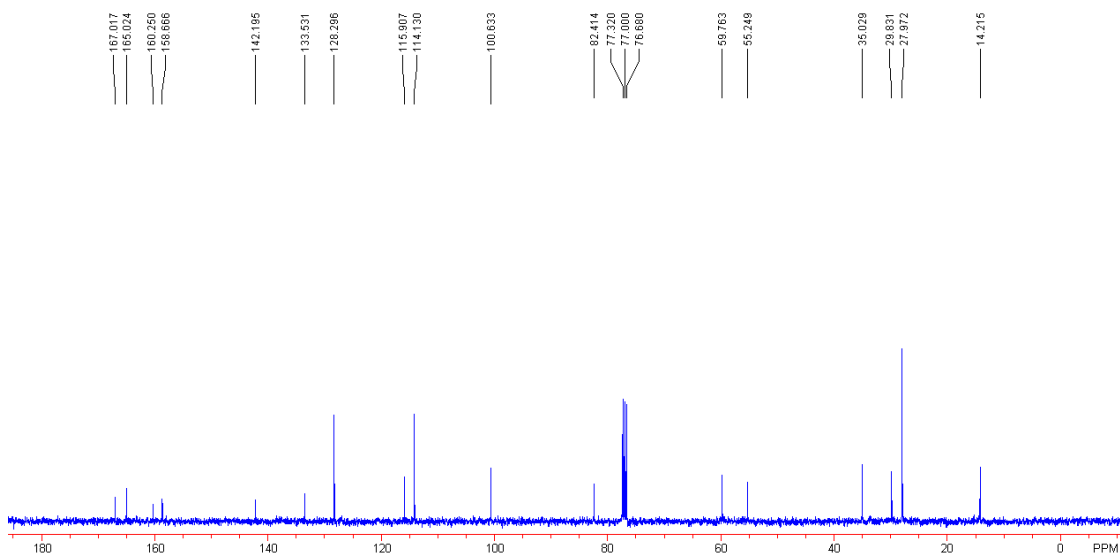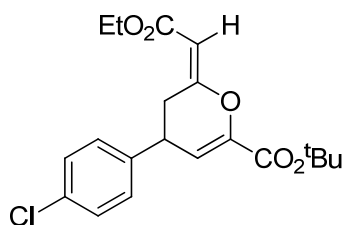

*(E)*-tert-butyl

4-(4-chlorophenyl)-2-(2-ethoxy-2-oxoethylidene)-3,4-dihydro-2*H*-pyran-6-carboxylate **3ga**: a slight yellow liquid (44.8 mg, 92%);  $^1\text{H}$  NMR ( $\text{CDCl}_3$ , 400 MHz, TMS)  $\delta$  1.23 (t,  $J = 7.2$  Hz, 3H), 1.54 (s, 9H), 3.18 (dd,  $J = 15.6$  Hz, 8.0 Hz, 1H), 3.54 (dd,  $J = 15.6$  Hz, 6.0 Hz, 1H), 3.65-3.68 (m, 1H), 4.07-4.13 (m, 2H), 5.73 (s, 1H), 6.29 (d,  $J = 4.4$  Hz, 1H), 7.14 (d,  $J = 8.4$  Hz, 2H), 7.30 (d,  $J = 8.4$  Hz, 2H);  $^{13}\text{C}$  NMR ( $\text{CDCl}_3$ , 100 MHz, TMS)  $\delta$  14.2, 27.9, 29.5, 35.2, 59.8, 82.6, 101.0, 114.6, 128.7, 128.9, 133.0, 139.9, 142.6, 160.1, 164.3, 166.9; IR ( $\text{CH}_2\text{Cl}_2$ )  $\nu$  2980, 2359, 2341, 1716, 1655, 1492, 1371, 1347, 1258, 1164, 1117, 1015, 848, 764  $\text{cm}^{-1}$ ; MS (ESI)  $m/z$  379.0 ( $\text{M}+\text{H}^+$ ); HRMS (ESI) Calcd. for  $\text{C}_{20}\text{H}_{24}\text{ClO}_5$  requires ( $\text{M}+\text{H}^+$ ): 379.1307, Found: 379.1322;  $[\alpha]_D^{20} = -162.4$  (c 1.95,  $\text{CH}_2\text{Cl}_2$ ) (90% ee); Chiralcel IC, hexane/*i*PrOH = 95/5, 0.6 mL/min, 254 nm,  $t_{\text{major}} = 24.55$  min,  $t_{\text{minor}} = 23.06$  min.

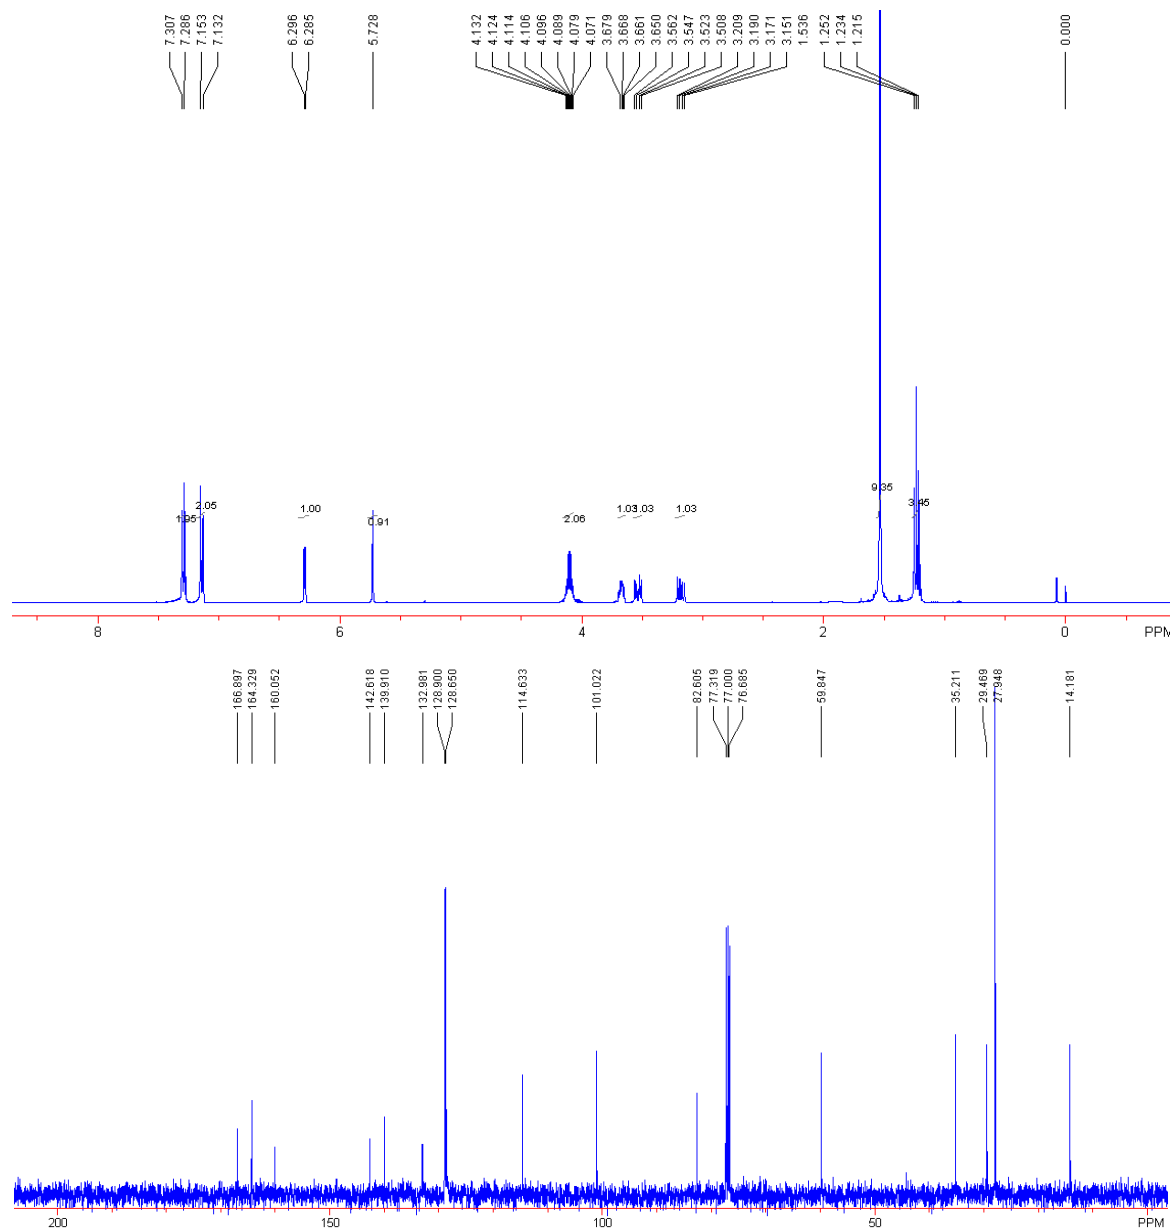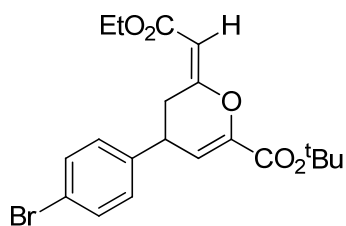

(*E*)-*tert*-butyl

4-(4-bromophenyl)-2-(2-ethoxy-2-oxoethylidene)-3,4-dihydro-2*H*-pyran-6-carboxylate **3ha**: a slight yellow liquid (36.8 mg, 92%); <sup>1</sup>H NMR (CDCl<sub>3</sub>, 400 MHz, TMS) δ 1.24 (t, *J* = 7.2 Hz, 3H), 1.53 (s, 9H), 3.18 (dd, *J* = 15.2 Hz, 7.6 Hz, 1H), 3.53 (dd, *J* = 15.2 Hz, 6.4 Hz, 1H), 3.64-3.68 (m, 1H), 4.07-4.13 (m, 2H), 5.73 (s, 1H), 6.28 (d, *J* = 4.0 Hz, 1H), 7.09 (d, *J* = 8.8

Hz, 2H), 7.45 (d,  $J = 8.8$  Hz, 2H);  $^{13}\text{C}$  NMR ( $\text{CDCl}_3$ , 100 MHz, TMS)  $\delta$  14.2, 28.0, 29.4, 35.3, 59.9, 82.6, 101.1, 114.5, 121.1, 129.0, 131.9, 140.5, 142.7, 160.1, 164.3, 166.9; IR ( $\text{CH}_2\text{Cl}_2$ )  $\nu$  2359, 2342, 1734, 1716, 1370, 1275, 1260, 1114, 750, 640, 605, 576  $\text{cm}^{-1}$ ; MS (ESI)  $m/z$  423.0 ( $\text{M}+\text{H}^+$ ); HRMS (ESI) Calcd. for  $\text{C}_{20}\text{H}_{24}\text{BrO}_5$  requires ( $\text{M}+\text{H}^+$ ): 423.0802, Found: 423.0814;  $[\alpha]_D^{20} = -186.8$  (c 0.45,  $\text{CH}_2\text{Cl}_2$ ) (90% ee); Chiralcel IC, hexane/ $i$ PrOH = 98/2, 0.6 mL/min, 254 nm,  $t_{\text{major}} = 15.08$  min,  $t_{\text{minor}} = 14.21$  min.

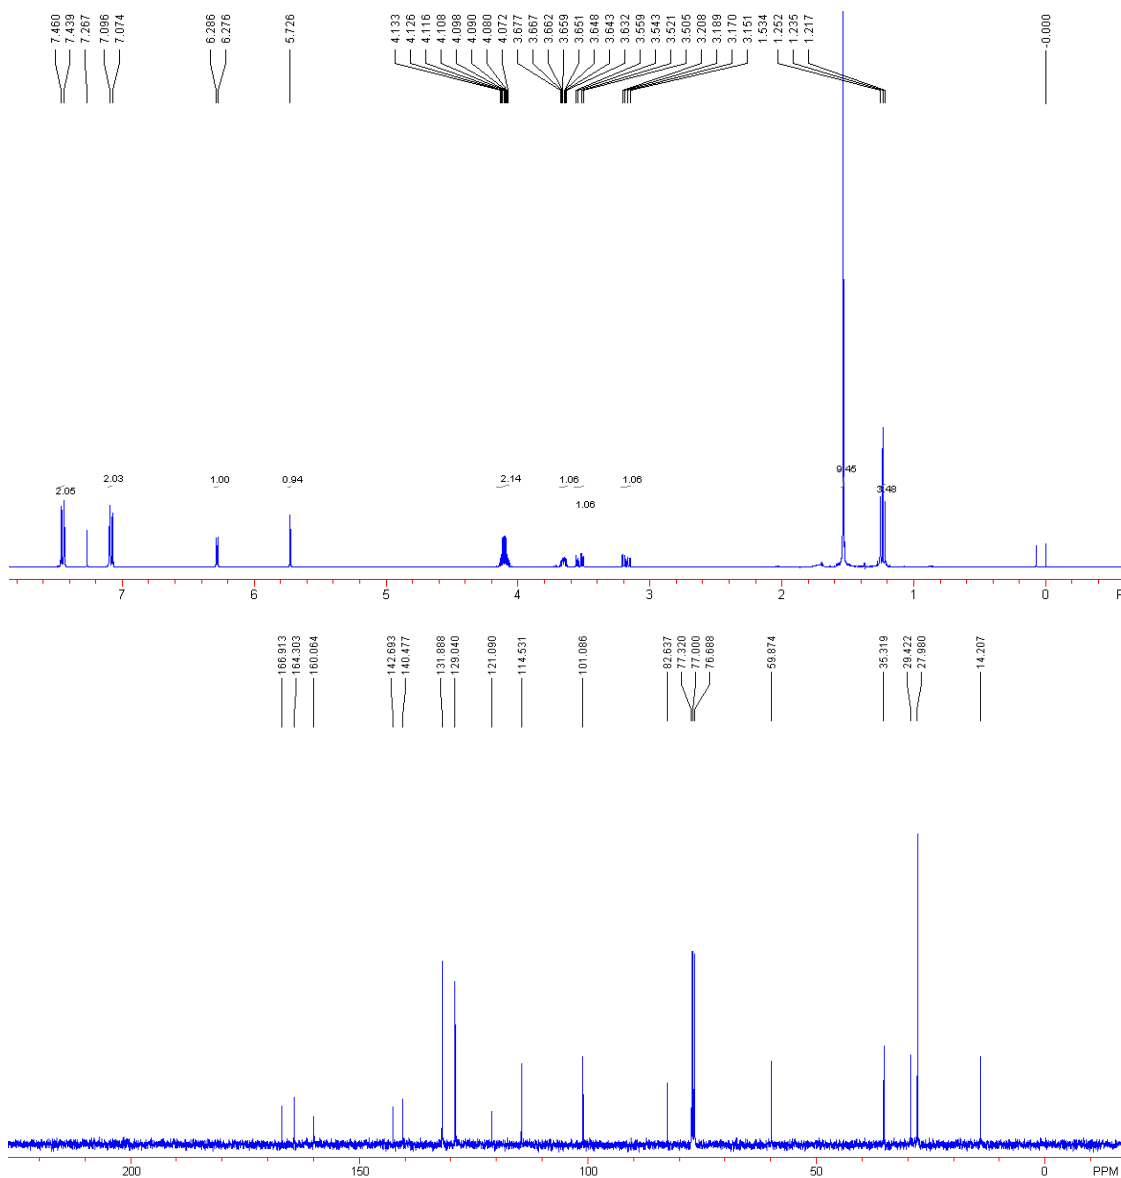



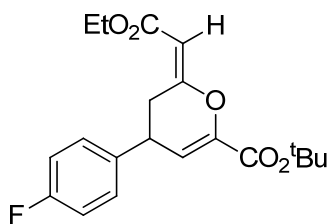

(*E*)-*tert*-butyl

2-(2-ethoxy-2-oxoethylidene)-4-(4-fluorophenyl)-3,4-dihydro-2*H*-pyran-6-carboxylate **3ia**: a slight yellow liquid (32.1 mg, 89%);  $^1\text{H}$  NMR ( $\text{CDCl}_3$ , 300 MHz, TMS)  $\delta$  1.23 (t,  $J = 7.2$  Hz, 3H), 1.54 (s, 9H), 3.16 (dd,  $J = 15.0$  Hz, 7.8 Hz, 1H), 3.55 (dd,  $J = 15.0$  Hz, 6.3 Hz, 1H), 3.65-3.71 (m, 1H), 4.10 (dq,  $J = 7.2$  Hz, 0.9 Hz, 2H), 5.73 (s, 1H), 6.30 (d,  $J = 3.9$  Hz, 1H), 7.01 (t,  $J = 8.4$  Hz, 2H), 7.17 (dd,  $J = 8.4$  Hz, 5.4 Hz, 2H);  $^{13}\text{C}$  NMR ( $\text{CDCl}_3$ , 75 MHz, TMS)  $\delta$  14.2, 28.0, 29.7, 35.1, 59.8, 82.6, 100.0, 115.0, 115.6 (d,  $J_{\text{C-F}} = 21.5$  Hz), 128.8 (d,  $J_{\text{C-F}} = 8.0$  Hz), 137.2 (d,  $J_{\text{C-F}} = 2.9$  Hz), 142.5, 160.1, 161.9 (d,  $J_{\text{C-F}} = 244.0$  Hz), 164.5, 166.9;  $^{19}\text{F}$  NMR ( $\text{CDCl}_3$ , 282 MHz,  $\text{CFCl}_3$ ):  $\delta$  -115.822 ~ -115.724 (m, 1F); IR ( $\text{CH}_2\text{Cl}_2$ )  $\nu$  2359, 2342, 1734, 1716, 1653, 1558, 1541, 1507, 1276, 1108, 750, 669  $\text{cm}^{-1}$ ; MS (ESI)  $m/z$  385.1 ( $\text{M}+\text{Na}^+$ ); HRMS (ESI) Calcd. for  $\text{C}_{20}\text{H}_{23}\text{FO}_5\text{Na}$  requires ( $\text{M}+\text{Na}^+$ ): 385.1422, Found: 385.1421;  $[\alpha]_{\text{D}}^{20} = -183.1$  (c 1.40,  $\text{CH}_2\text{Cl}_2$ ) (90% ee); Chiralcel AS-H, hexane/*i*PrOH = 98/2, 0.6 mL/min, 254 nm,  $t_{\text{major}} = 12.00$  min,  $t_{\text{minor}} = 11.22$  min.

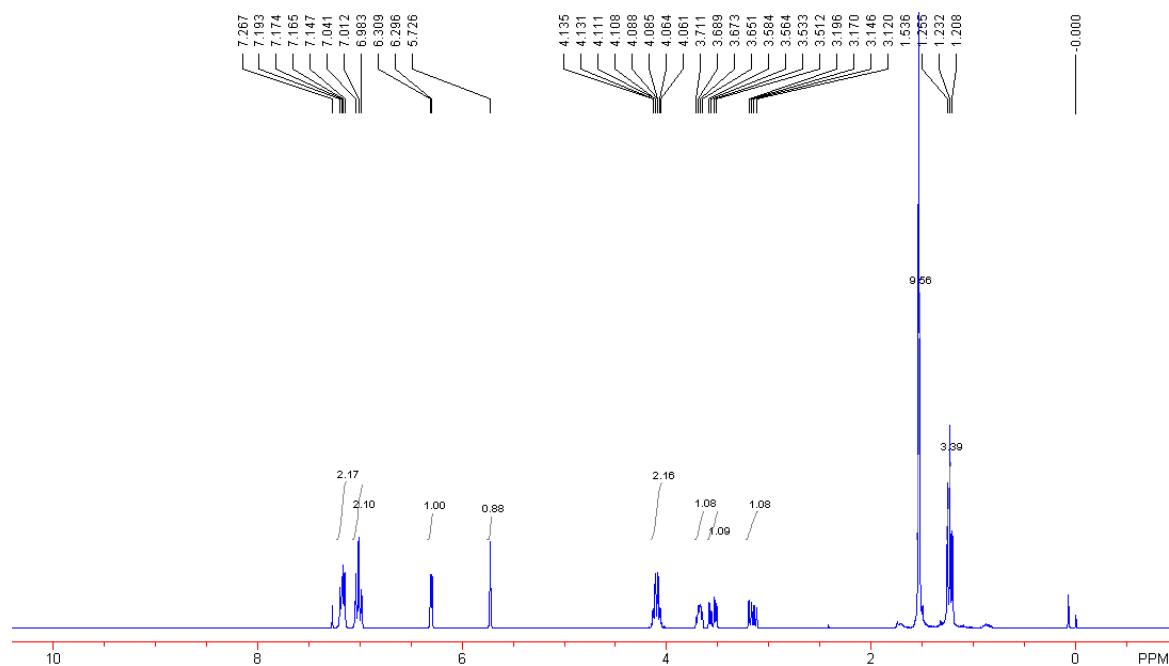

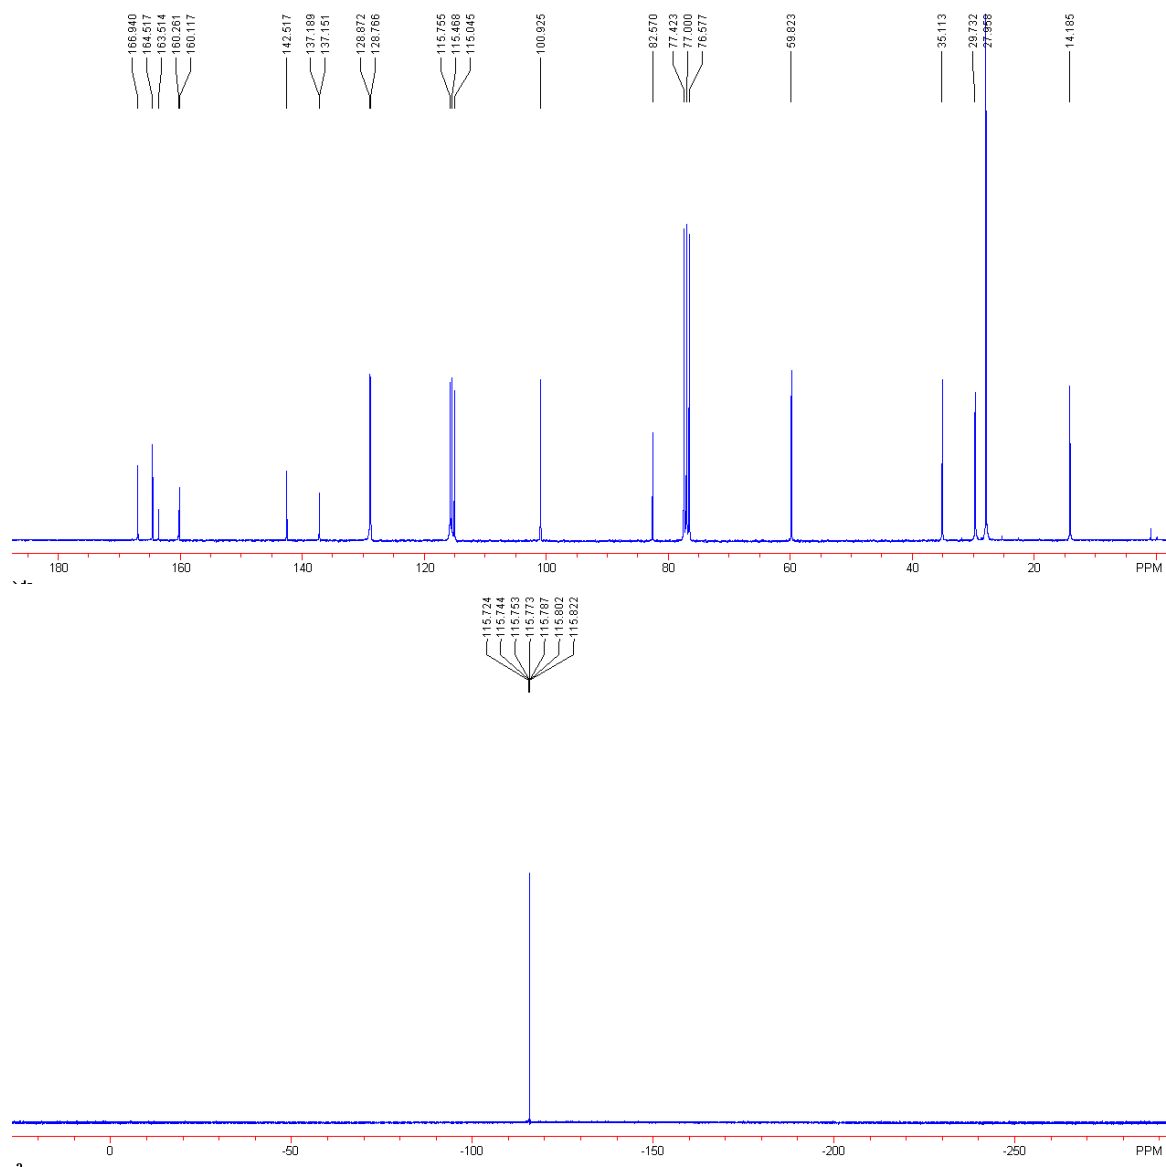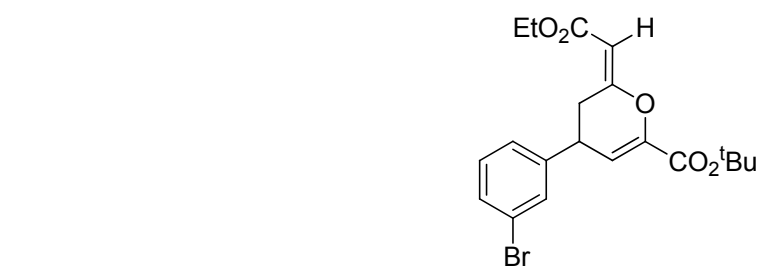

*(E)*-*tert*-butyl

4-(3-bromophenyl)-2-(2-ethoxy-2-oxoethylidene)-3,4-dihydro-2*H*-pyran-6-carboxylate **3ja**: a slight yellow liquid (35.8 mg, 85%); <sup>1</sup>H NMR (CDCl<sub>3</sub>, 400 MHz, TMS) δ 1.24 (t, *J* = 7.2 Hz, 3H), 1.54 (s, 9H), 3.12 (dd, *J* = 14.8 Hz, 7.2 Hz, 1H), 3.58-3.67 (m, 2H), 4.11 (dq, *J* = 7.2 Hz, 1.6 Hz, 2H), 5.74 (s, 1H), 6.28 (d, *J* = 3.6 Hz, 1H), 7.13-7.16 (m, 1H), 7.20 (t, *J* = 7.6 Hz, 1H),

7.35 (t,  $J = 7.6$  Hz, 1H), 7.38-7.41 (m, 1H);  $^{13}\text{C}$  NMR ( $\text{CDCl}_3$ , 100 MHz, TMS)  $\delta$  14.2, 28.0, 29.4, 35.5, 59.8, 82.7, 101.1, 114.3, 122.8, 126.0, 130.4, 142.8, 143.8, 160.0, 164.2, 166.9; IR ( $\text{CH}_2\text{Cl}_2$ )  $\nu$  2979, 2932, 2360, 2342, 1733, 1716, 1655, 1593, 1568, 1475, 1394, 1371, 1347, 1257, 1164, 1115, 1045, 848, 764  $\text{cm}^{-1}$ ; MS (ESI)  $m/z$  445.0 ( $\text{M}+\text{Na}^+$ ); HRMS (ESI) Calcd. for  $\text{C}_{20}\text{H}_{23}\text{BrO}_5\text{Na}$  requires ( $\text{M}+\text{Na}^+$ ): 445.0621, Found: 445.0619;  $[\alpha]_{\text{D}}^{20} = -195.7$  (c 1.65,  $\text{CHCl}_3$ ) (88% ee); Chiralcel IC, hexane/ $i$ PrOH = 98/2, 0.6 mL/min, 254 nm,  $t_{\text{major}} = 26.85$  min,  $t_{\text{minor}} = 23.17$  min.

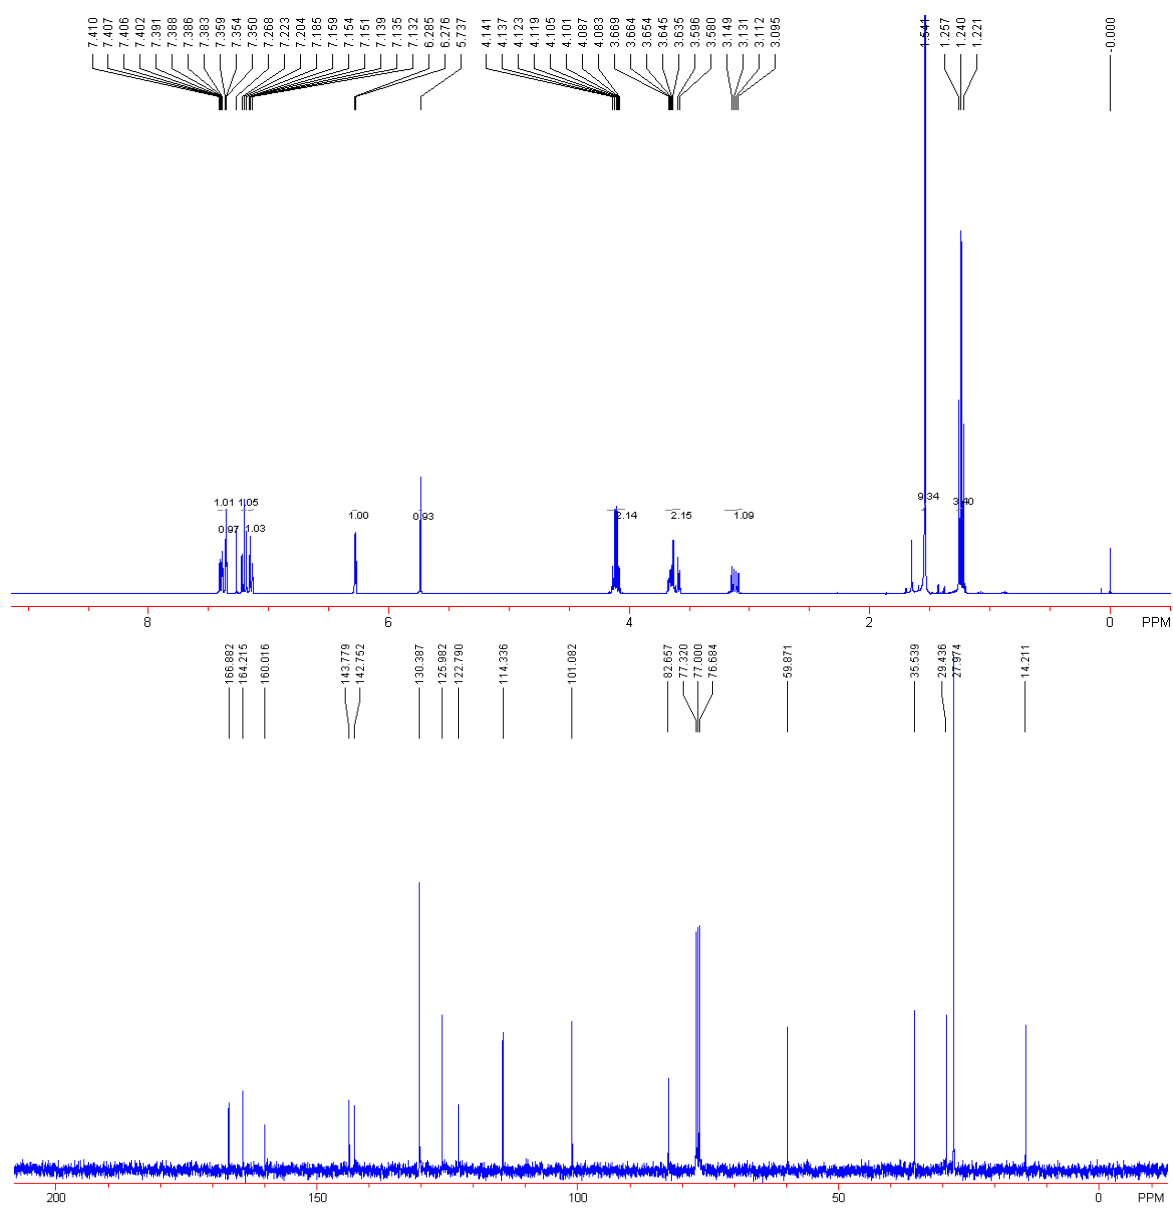

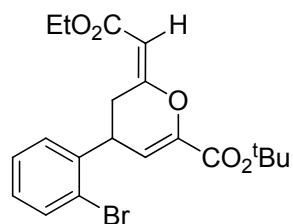

(*E*)-*tert*-butyl

4-(2-bromophenyl)-2-(2-ethoxy-2-oxoethylidene)-3,4-dihydro-2*H*-pyran-6-carboxylate **3ka**: a slight yellow liquid (36.4 mg, 91%);  $^1\text{H}$  NMR ( $\text{CDCl}_3$ , 400 MHz, TMS)  $\delta$  1.22 (t,  $J = 7.2$  Hz, 3H), 1.54 (s, 9H), 3.23 (dd,  $J = 15.2$  Hz, 7.2 Hz, 1H), 3.55 (dd,  $J = 15.2$  Hz, 6.4 Hz, 1H), 4.06-4.14 (m, 2H), 4.16-4.21 (m, 1H), 5.73 (s, 1H), 6.31 (d,  $J = 4.4$  Hz, 1H), 7.10-7.14 (m, 1H), 7.16 (dd,  $J = 7.6$  Hz, 1.6 Hz, 1H), 7.26-7.30 (m, 1H), 7.57 (dd,  $J = 7.6$  Hz, 1.6 Hz, 1H);  $^{13}\text{C}$  NMR ( $\text{CDCl}_3$ , 100 MHz, TMS)  $\delta$  14.2, 28.0, 28.2, 35.2, 59.8, 82.6, 101.3, 114.1, 124.0, 127.9, 128.4, 128.8, 133.1, 140.2, 143.1, 160.1, 164.1, 166.7; IR ( $\text{CH}_2\text{Cl}_2$ )  $\nu$  2980, 2360, 2342, 1734, 1717, 1654, 1472, 1372, 1275, 1260, 1165, 1113, 848, 750, 669  $\text{cm}^{-1}$ ; MS (ESI)  $m/z$  423.0 ( $\text{M}+\text{H}^+$ ); HRMS (ESI) Calcd. for  $\text{C}_{20}\text{H}_{24}\text{BrO}_5$  requires ( $\text{M}+\text{H}^+$ ): 423.0802, Found: 423.0810;  $[\alpha]_D^{20} = -52.9$  (c 2.00,  $\text{CH}_2\text{Cl}_2$ ) (80% ee); Chiralcel IC, hexane/*i*PrOH = 98/2, 0.6 mL/min, 254 nm,  $t_{\text{major}} = 29.29$  min,  $t_{\text{minor}} = 25.58$  min.

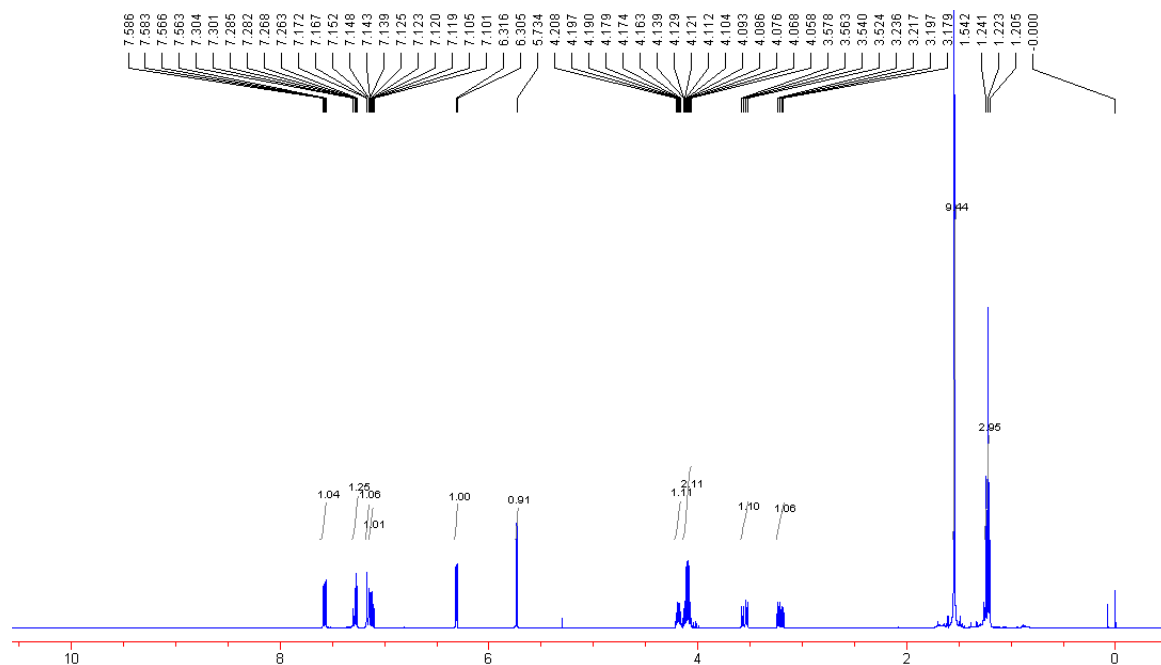

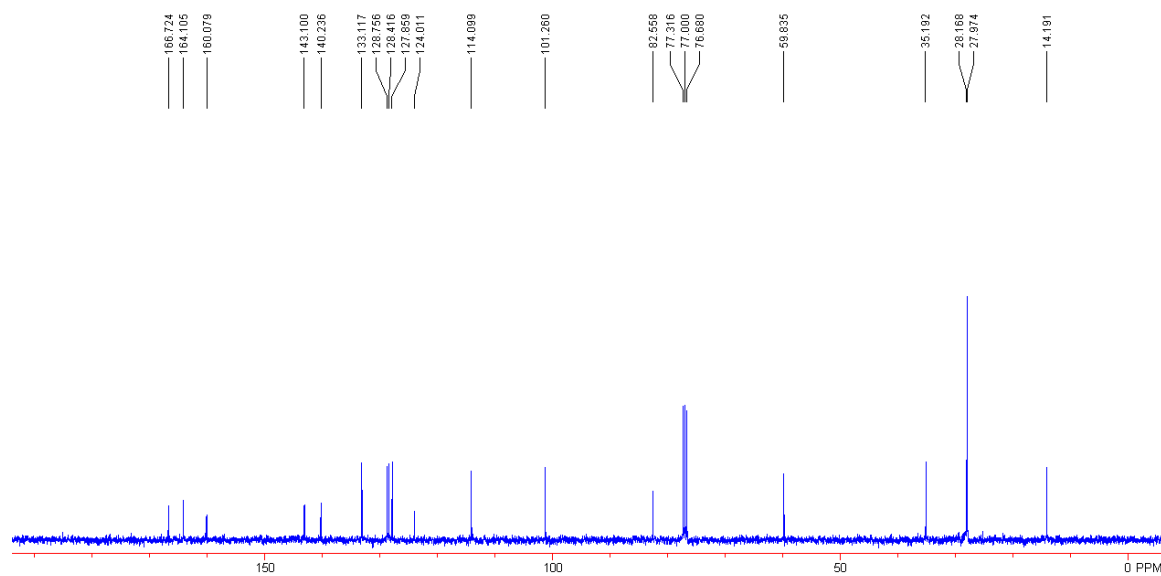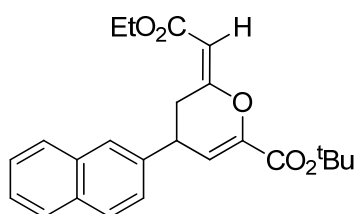

*(E)*-*tert*-butyl

2-(2-ethoxy-2-oxoethylidene)-4-(naphthalen-2-yl)-3,4-dihydro-2*H*-pyran-6-carboxylate **3a**: a slight yellow liquid (46.2 mg, 90%); <sup>1</sup>H NMR (CDCl<sub>3</sub>, 400 MHz, TMS) δ 1.21 (t, *J* = 7.2 Hz, 3H), 1.55 (s, 9H), 3.27 (dd, *J* = 15.6 Hz, 8.0 Hz, 1H), 3.69 (dd, *J* = 15.6 Hz, 6.0 Hz, 1H), 3.83-3.87 (m, 1H), 4.04-4.12 (m, 2H), 5.75 (s, 1H), 6.42 (d, *J* = 4.0 Hz, 1H), 7.34 (dd, *J* = 8.4 Hz, 1.6 Hz, 1H), 7.43-7.50 (m, 2H), 7.64 (s, 1H), 7.78-7.83 (m, 3H); <sup>13</sup>C NMR (CDCl<sub>3</sub>, 100 MHz, TMS) δ 14.2, 28.0, 29.5, 35.9, 59.8, 82.5, 100.8, 115.3, 125.5, 125.80, 125.84, 126.2, 127.6, 127.7, 128.6, 132.5, 133.4, 138.8, 142.5, 160.2, 164.8, 167.0; IR (CH<sub>2</sub>Cl<sub>2</sub>) ν 2979, 2931, 2359, 2341, 1733, 1717, 1654, 1508, 1457, 1394, 1373, 1260, 1163, 1113, 847, 749 cm<sup>-1</sup>; MS (ESI) *m/z* 395.1 (M+H<sup>+</sup>); HRMS (ESI) Calcd. for C<sub>24</sub>H<sub>27</sub>O<sub>5</sub> requires (M+H<sup>+</sup>): 395.1853, Found: 395.1865; [α]<sub>D</sub><sup>20</sup> = -301.6 (c 1.50, CH<sub>2</sub>Cl<sub>2</sub>) (91% ee); Chiralcel IC, hexane/*i*PrOH = 98/2, 0.6 mL/min, 254 nm, *t*<sub>major</sub> = 34.00 min, *t*<sub>minor</sub> = 30.70 min.

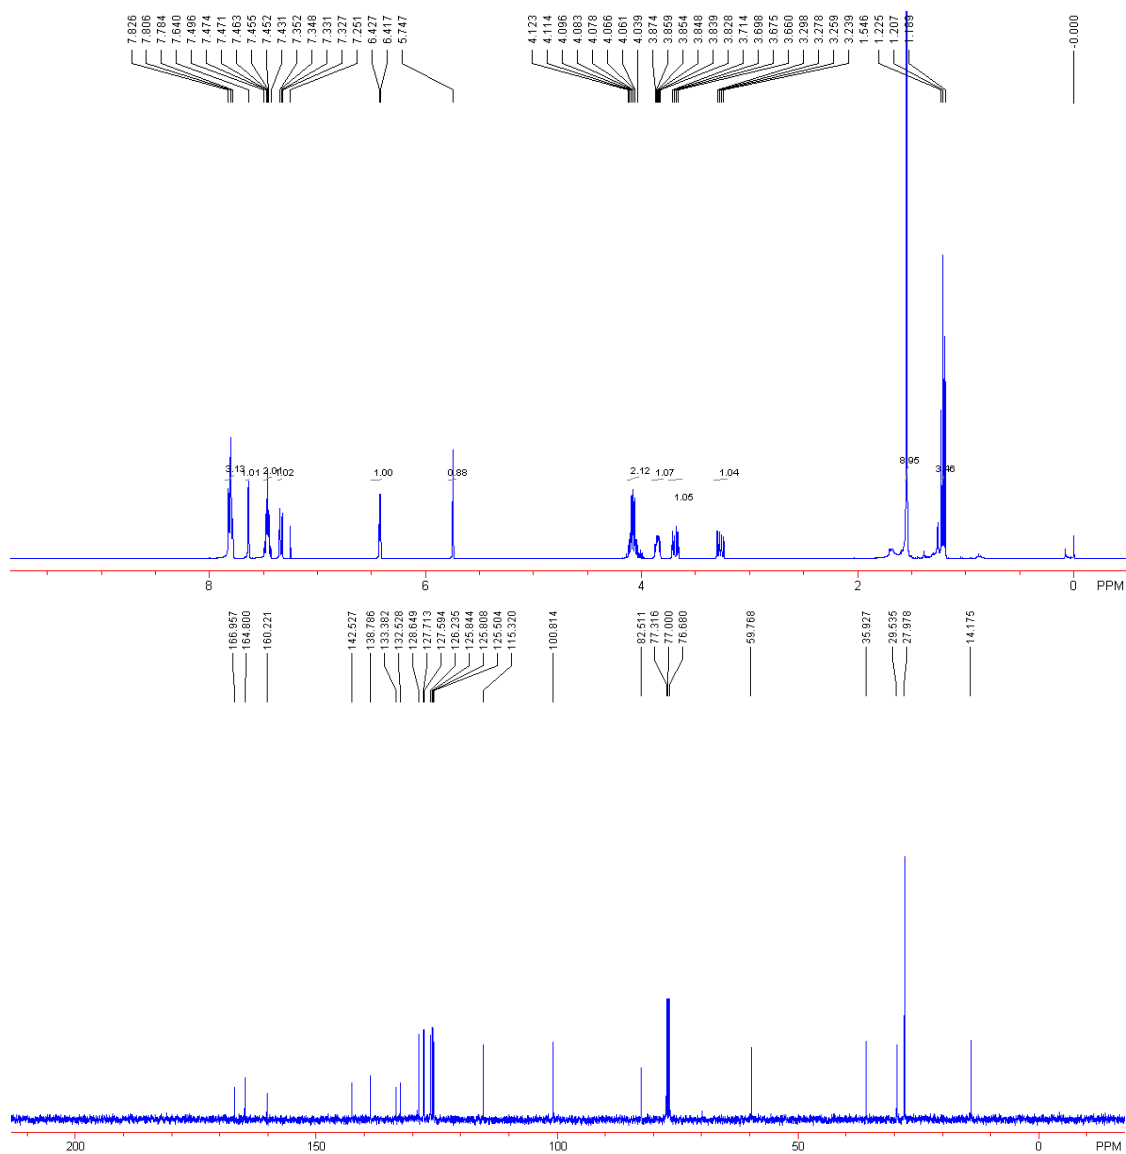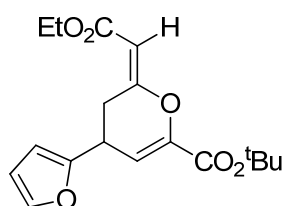

(*E*)-*tert*-butyl

2-(2-ethoxy-2-oxoethylidene)-4-(furan-2-yl)-3,4-dihydro-2*H*-pyran-6-carboxylate **3ma**: a slight yellow liquid (24.0 mg, 72%); <sup>1</sup>H NMR (CDCl<sub>3</sub>, 400 MHz, TMS) δ 1.27 (t, *J* = 7.2 Hz, 3H), 1.52 (s, 9H), 3.35 (dd, *J* = 15.6 Hz, 7.6 Hz, 1H), 3.52 (dd, *J* = 15.6 Hz, 6.0 Hz, 1H), 3.76-3.80 (m, 1H), 4.15 (dq, *J* = 7.2 Hz, 1.6 Hz, 2H), 5.73 (s, 1H), 6.12 (d, *J* = 3.2 Hz, 1H), 6.30 (dd, *J* = 3.2 Hz, 1.6 Hz, 1H), 6.34 (d, *J* = 4.4 Hz, 1H), 7.35 (d, *J* = 1.6 Hz, 1H); <sup>13</sup>C NMR (CDCl<sub>3</sub>, 100 MHz, TMS) δ 14.3, 26.4, 28.0, 29.7, 59.9, 82.6, 101.1, 105.6, 110.3, 112.5, 142.0,

142.5, 153.7, 160.1, 164.4, 167.0; IR (CH<sub>2</sub>Cl<sub>2</sub>) v 2360, 2342, 1733, 1716, 1275, 1260, 1116, 846, 750, 669, cm<sup>-1</sup>; MS (ESI) *m/z* 357.1 (M+Na<sup>+</sup>); HRMS (ESI) Calcd. for C<sub>18</sub>H<sub>22</sub>O<sub>6</sub>Na requires (M+Na<sup>+</sup>): 357.1309, Found: 357.1322; [α]<sup>20</sup><sub>D</sub> = -42.0 (c 0.30, CH<sub>2</sub>Cl<sub>2</sub>) (90% ee); Chiralcel IC, hexane/<sup>i</sup>PrOH = 98/2, 0.6 mL/min, 254 nm, *t*<sub>major</sub> = 23.11 min, *t*<sub>minor</sub> = 26.68 min.

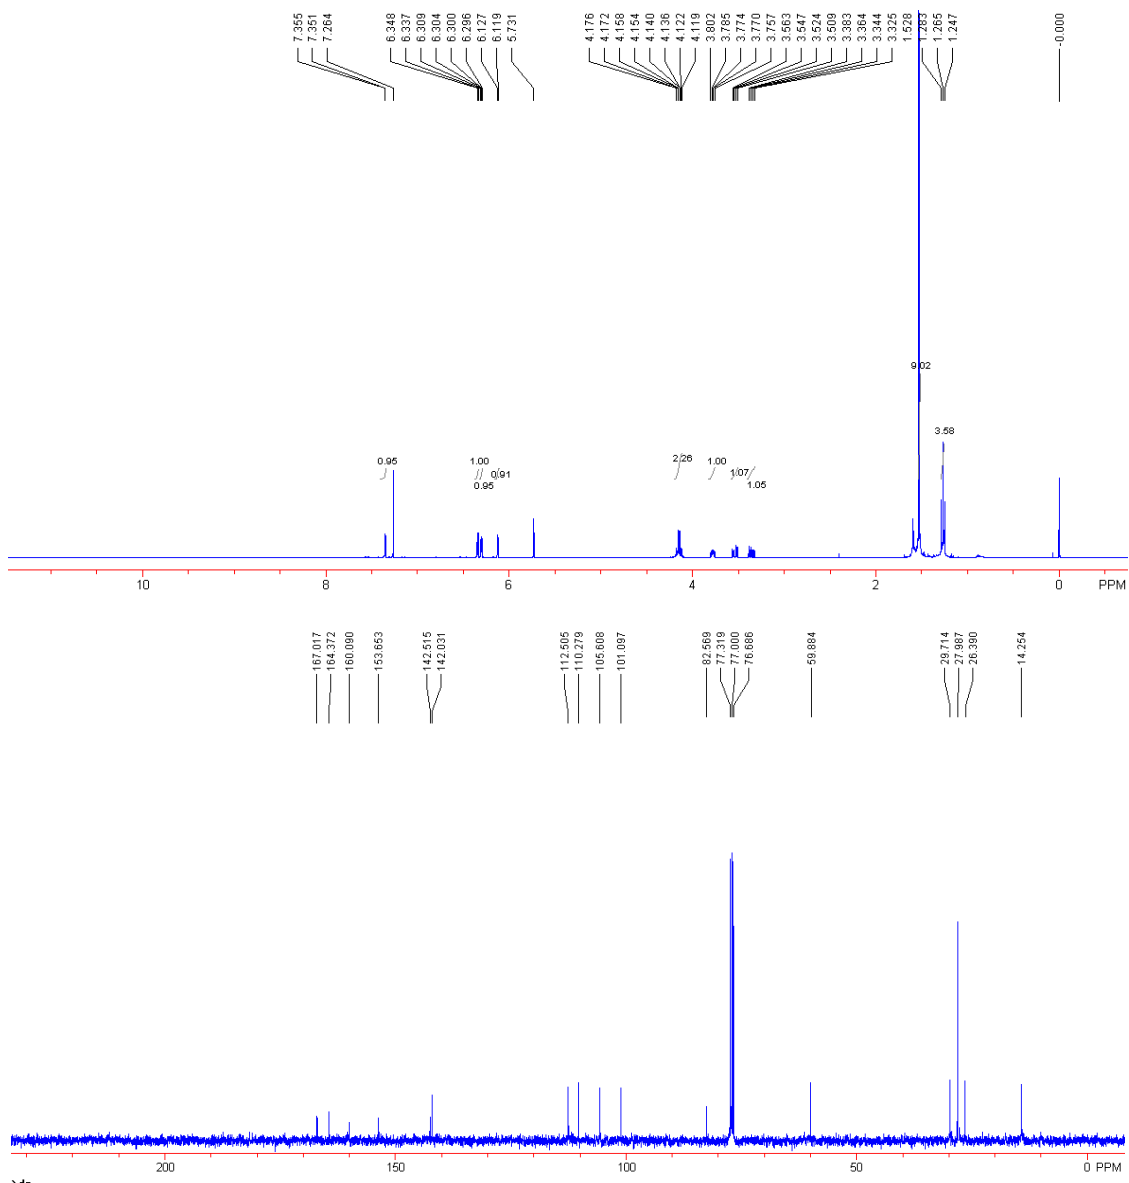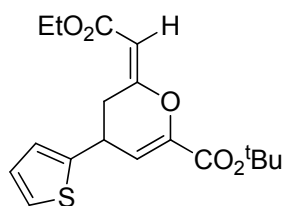

(*E*)-*tert*-butyl

2-(2-ethoxy-2-oxoethylidene)-4-(thiophen-2-yl)-3,4-dihydro-2*H*-pyran-6-carboxylate **3na**: a

slight yellow liquid (26.3 mg, 75%);  $^1\text{H}$  NMR ( $\text{CDCl}_3$ , 400 MHz, TMS)  $\delta$  1.25 (t,  $J = 7.2$  Hz, 3H), 1.53 (s, 9H), 3.40 (dd,  $J = 15.6$  Hz, 7.2 Hz, 1H), 3.54 (dd,  $J = 15.6$  Hz, 6.0 Hz, 1H), 3.96-4.00 (m, 1H), 4.13 (dq,  $J = 7.2$  Hz, 2.4 Hz, 2H), 5.75 (s, 1H), 6.37 (d,  $J = 4.4$  Hz, 1H), 6.90 (d,  $J = 3.2$  Hz, 1H), 6.95 (dd,  $J = 5.2$  Hz, 3.2 Hz, 1H), 7.20 (d,  $J = 5.2$  Hz, 1H);  $^{13}\text{C}$  NMR ( $\text{CDCl}_3$ , 100 MHz, TMS)  $\delta$  14.2, 28.0, 29.7, 31.2, 59.9, 82.6, 101.4, 114.8, 124.3, 124.4, 126.9, 142.1, 144.4, 160.1, 164.2, 166.9; IR ( $\text{CH}_2\text{Cl}_2$ )  $\nu$  2983, 2360, 2342, 1733, 1715, 1659, 1507, 1372, 1276, 1260, 1115, 848, 750, 668  $\text{cm}^{-1}$ ; MS (ESI)  $m/z$  351.1 ( $\text{M}+\text{H}^+$ ); HRMS (ESI) Calcd. for  $\text{C}_{18}\text{H}_{23}\text{SO}_5$  requires ( $\text{M}+\text{H}^+$ ): 351.1261, Found: 351.1275;  $[\alpha]_D^{20} = -178.8$  (c 0.50,  $\text{CH}_2\text{Cl}_2$ ) (91% ee); Chiralcel IC, hexane/ $^i\text{PrOH} = 98/2$ , 0.6 mL/min, 254 nm,  $t_{\text{major}} = 26.81$  min,  $t_{\text{minor}} = 30.47$  min.

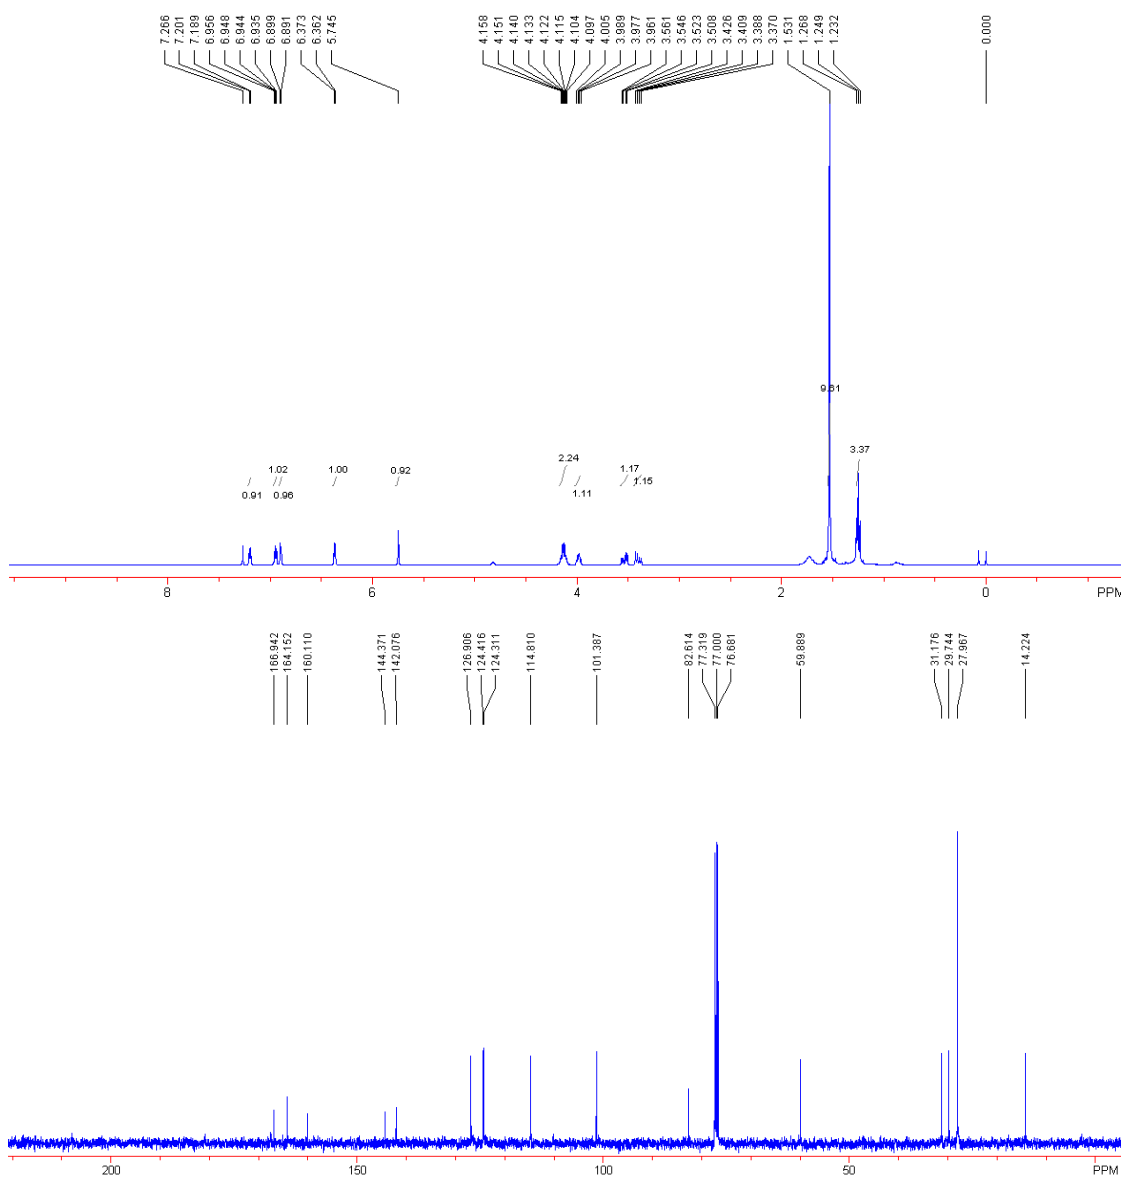



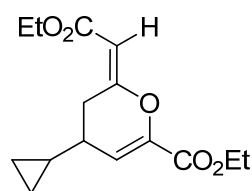

(*E*)-ethyl 4-cyclopropyl-2-(2-ethoxy-2-oxoethylidene)-3,4-dihydro-2H-pyran-6-carboxylate  
**7ka**: a slight yellow liquid (26.0 mg, 83%); This is a known compound;<sup>3</sup> <sup>1</sup>H NMR (CDCl<sub>3</sub>, 400 MHz, TMS) δ 0.23-0.26 (m, 2H), 0.52-0.56 (m, 2H), 0.70-0.76 (m, 1H), 1.28 (t, *J* = 7.2 Hz, 3H), 1.35 (t, *J* = 7.2 Hz, 3H), 1.72-1.79 (m, 1H), 2.92 (dd, *J* = 15.2 Hz, 8.4 Hz, 1H), 3.48 (dd, *J* = 15.2 Hz, 5.6 Hz, 1H), 4.16 (q, *J* = 7.2 Hz, 2H), 4.27-4.32 (m, 2H), 5.70 (s, 1H), 6.32 (d, *J* = 4.0 Hz, 1H); [α]<sub>D</sub><sup>20</sup> = -69.1 (c 1.00, CH<sub>2</sub>Cl<sub>2</sub>) (86% ee); Chiralcel OJ-H, hexane/<sup>*i*</sup>PrOH = 98/2, 0.6 mL/min, 254 nm, *t*<sub>major</sub> = 17.47 min, *t*<sub>minor</sub> = 22.76 min.

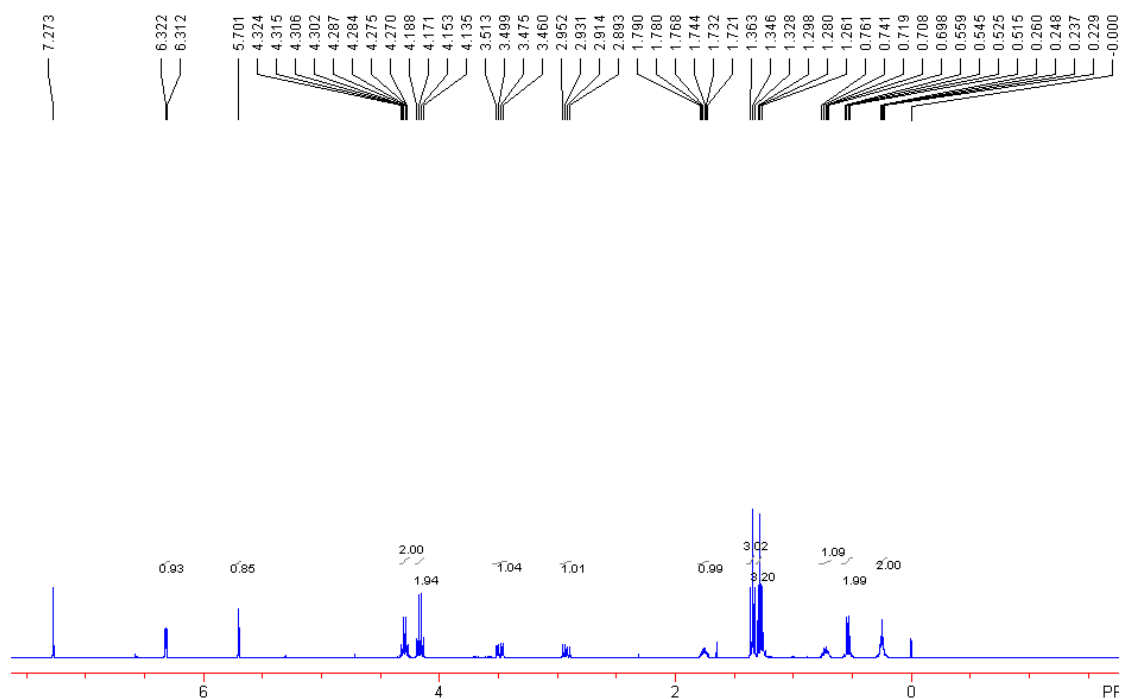

### Chiral HPLC traces of the products 3

Column: AD-H

Velocity(ml/min): 0.7 ml/min

Mobile Phase: hexane/PrOH = 80/20

Detection Wavelength(nm): 254 nm

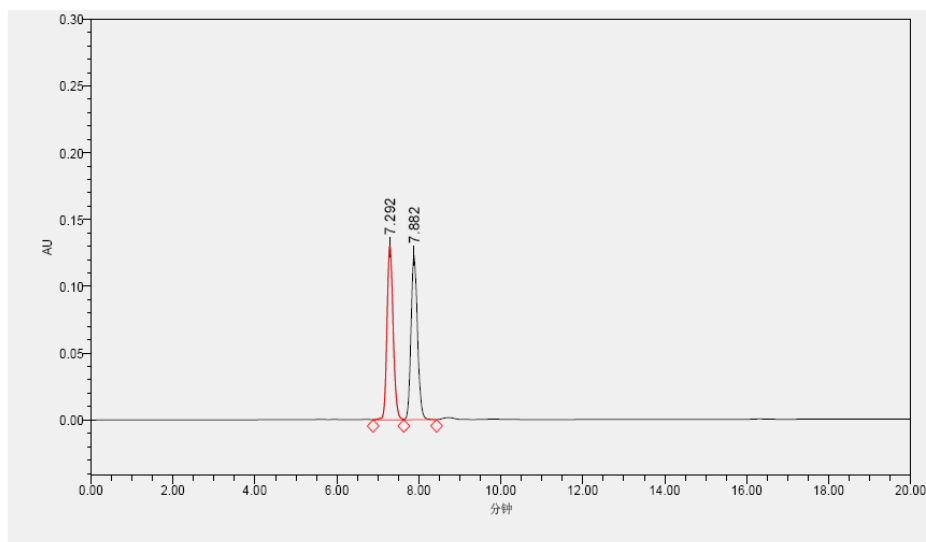

|   | 保留时间  | 面积(微伏*<br>秒) | % 面积  | 高度(微<br>伏) | 积分类型 |
|---|-------|--------------|-------|------------|------|
| 1 | 7.292 | 1358487      | 50.07 | 130169     | VV   |
| 2 | 7.882 | 1354580      | 49.93 | 122728     | VV   |

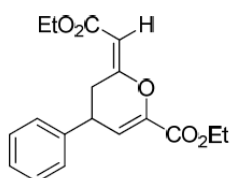

Chiralcel AD-H,  
hexane/PrOH = 80/20,  
0.6 mL/min, 254nm

Column: AD-H  
Velocity(ml/min): 0.7 ml/min

Mobile Phase: hexane/iPrOH = 80/20  
Detection Wavelength(nm): 254 nm

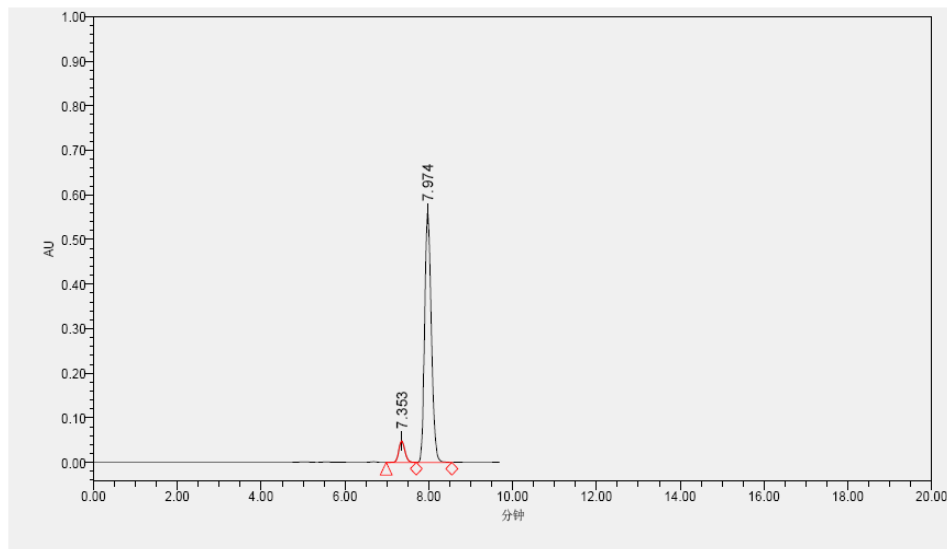

|   | 保留时间  | 面积 (微伏 * 秒) | % 面积  | 高度 (微伏) | 积分类型 |
|---|-------|-------------|-------|---------|------|
| 1 | 7.353 | 489174      | 7.31  | 48061   | bV   |
| 2 | 7.974 | 6205075     | 92.69 | 560739  | VV   |

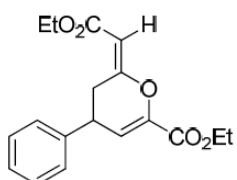

Chiralcel AD-H,  
hexane/iPrOH = 80/20,  
0.6 mL/min, 254nm

Column: AD-H  
Velocity(ml/min): 0.6 ml/min

Mobile Phase: hexane/*i*PrOH = 90/10  
Detection Wavelength(nm): 254 nm

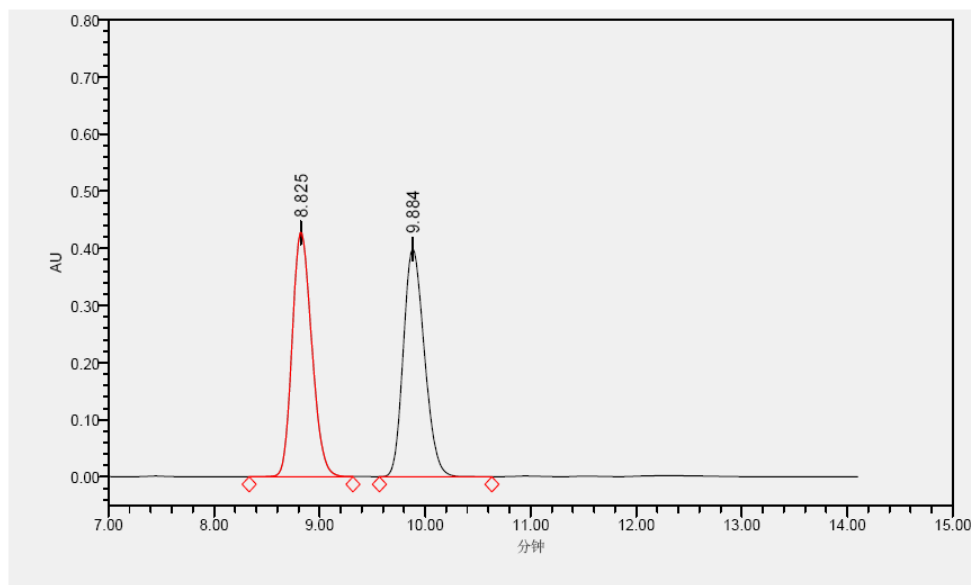

|   | 保留时间  | 面积(微伏*<br>秒) | % 面积  | 高度(微<br>伏) | 积分类型 |
|---|-------|--------------|-------|------------|------|
| 1 | 8.825 | 5536283      | 49.93 | 429268     | VV   |
| 2 | 9.884 | 5551188      | 50.07 | 399518     | VV   |

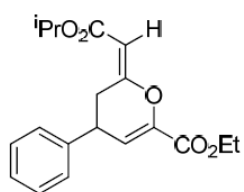

Chiralcel AD-H,  
hexane/*i*PrOH = 90/10,  
0.6 mL/min, 254nm

Column: AD-H  
Velocity(ml/min): 0.6 ml/min

Mobile Phase: hexane/iPrOH = 90/10  
Detection Wavelength(nm): 254 nm

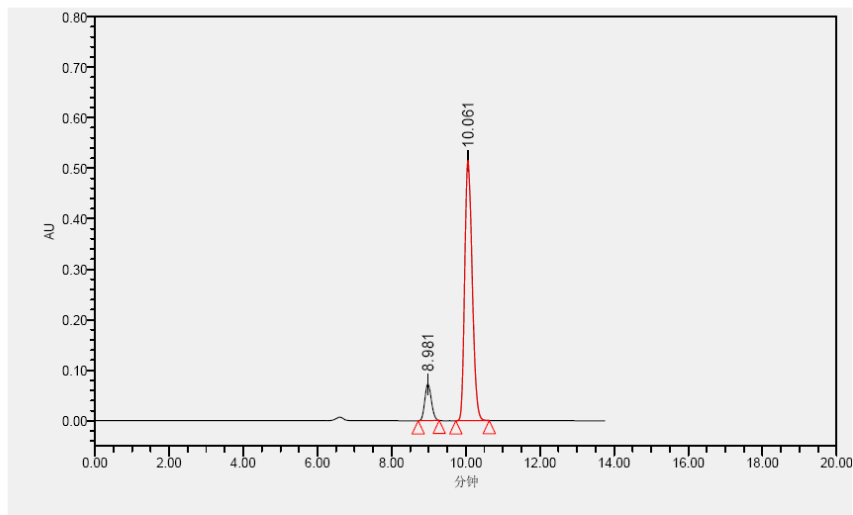

|   | 保留时间   | 面积(微伏*<br>秒) | % 面积  | 高度(微<br>伏) | 积分类型 |
|---|--------|--------------|-------|------------|------|
| 1 | 8.981  | 897249       | 11.10 | 72404      | bb   |
| 2 | 10.061 | 7183824      | 88.90 | 516214     | bb   |

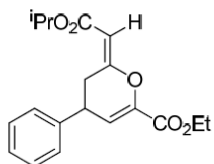

Chiralcel AD-H,  
hexane/iPrOH = 90/10,  
0.6 mL/min, 254nm

Column: AD-H  
Velocity(ml/min): 0.6 ml/min

Mobile Phase: hexane/PrOH = 90/10  
Detection Wavelength(nm): 254 nm

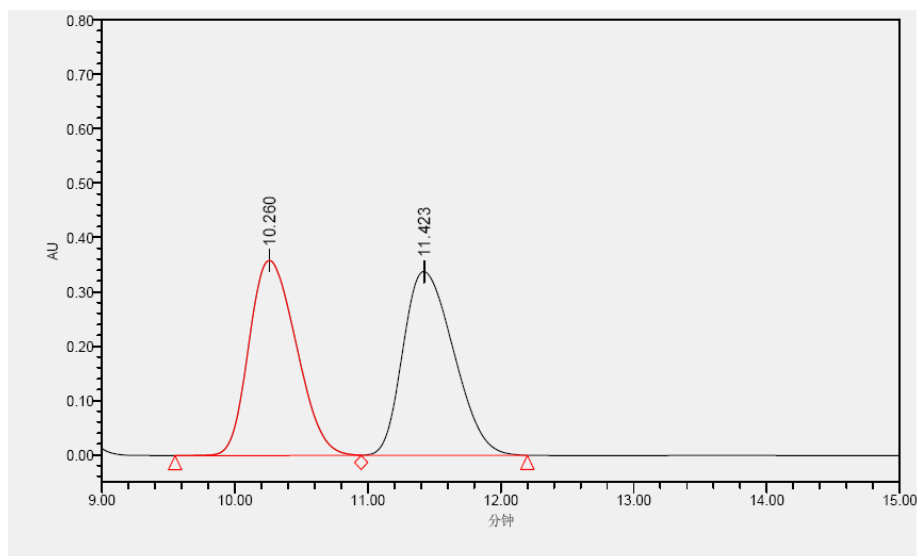

|   | 保留时间   | 面积(微伏*<br>秒) | % 面积  | 高度(微<br>伏) | 积分类型 |
|---|--------|--------------|-------|------------|------|
| 1 | 10.260 | 8874599      | 49.78 | 358983     | BV   |
| 2 | 11.423 | 8953679      | 50.22 | 338264     | Vb   |

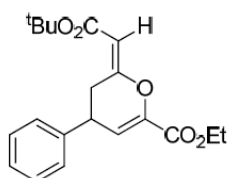

Chiralcel AD-H,  
hexane/PrOH = 90/10,  
0.6 mL/min, 254nm

Column: AD-H  
Velocity(ml/min): 0.6 ml/min

Mobile Phase: hexane/iPrOH = 90/10  
Detection Wavelength(nm): 254 nm

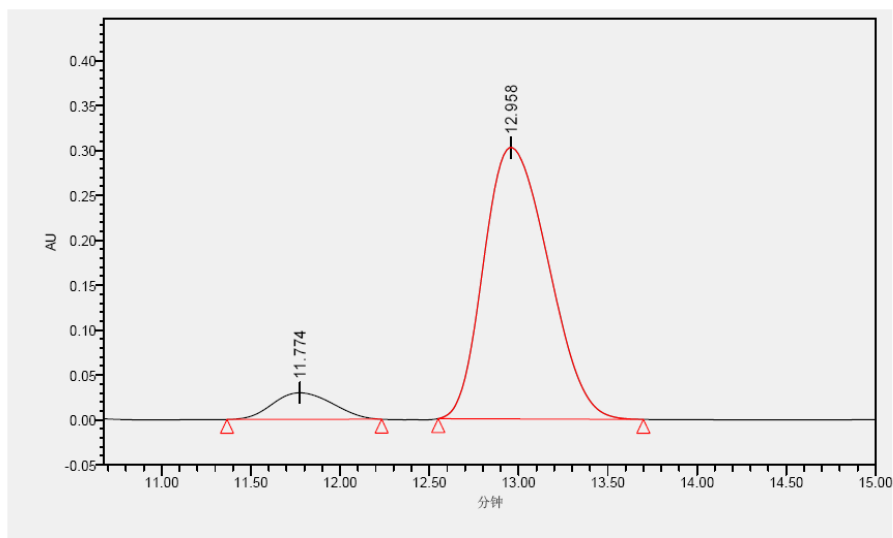

|   | 保留时间   | 面积(微伏*<br>秒) | % 面积  | 高度(微<br>伏) | 积分类型 |
|---|--------|--------------|-------|------------|------|
| 1 | 11.774 | 691204       | 8.34  | 29627      | bb   |
| 2 | 12.958 | 7600066      | 91.66 | 302582     | bb   |

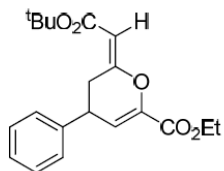

Chiralcel AD-H,  
hexane/iPrOH = 90/10,  
0.6 mL/min, 254nm

Column: AD-H  
Velocity(ml/min): 0.6 ml/min

Mobile Phase: hexane/PrOH = 98/2  
Detection Wavelength(nm): 254 nm

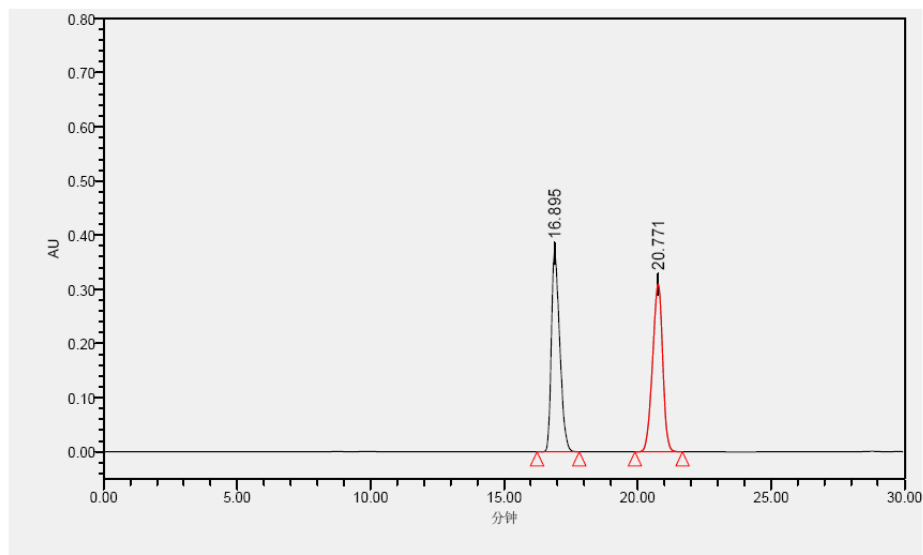

|   | 保留时间   | 面积(微伏*<br>秒) | % 面积  | 高度(微<br>伏) | 积分类型 |
|---|--------|--------------|-------|------------|------|
| 1 | 16.895 | 8099227      | 49.81 | 366757     | bb   |
| 2 | 20.771 | 8161505      | 50.19 | 309255     | bb   |

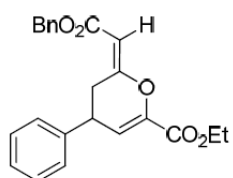

Chiralcel AD-H,  
hexane/PrOH = 98/2,  
0.6 mL/min, 254nm



Column: AD-H

Mobile Phase: hexane/iPrOH = 98/2

Velocity(ml/min): 0.6 ml/min

Detection Wavelength(nm): 254 nm

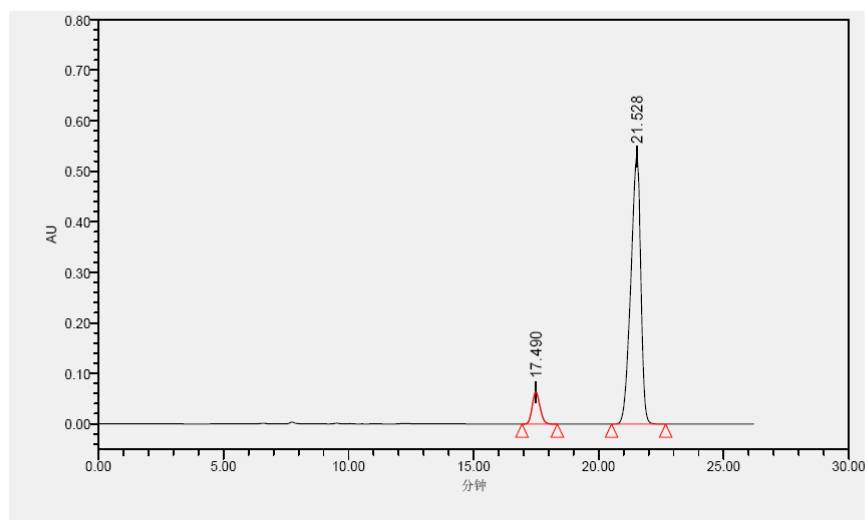

|   | 保留时间   | 面积(微伏*<br>秒) | % 面积  | 高度(微<br>伏) | 积分类型 |
|---|--------|--------------|-------|------------|------|
| 1 | 17.490 | 1373281      | 8.56  | 63437      | BB   |
| 2 | 21.528 | 14675893     | 91.44 | 529736     | BB   |

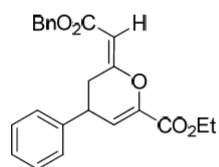

Chiralcel AD-H,  
hexane/iPrOH = 98/2,  
0.6 mL/min, 254nm

Column: AD-H  
Velocity(ml/min): 0.6 ml/min

Mobile Phase: hexane/iPrOH = 95/5  
Detection Wavelength(nm): 254 nm

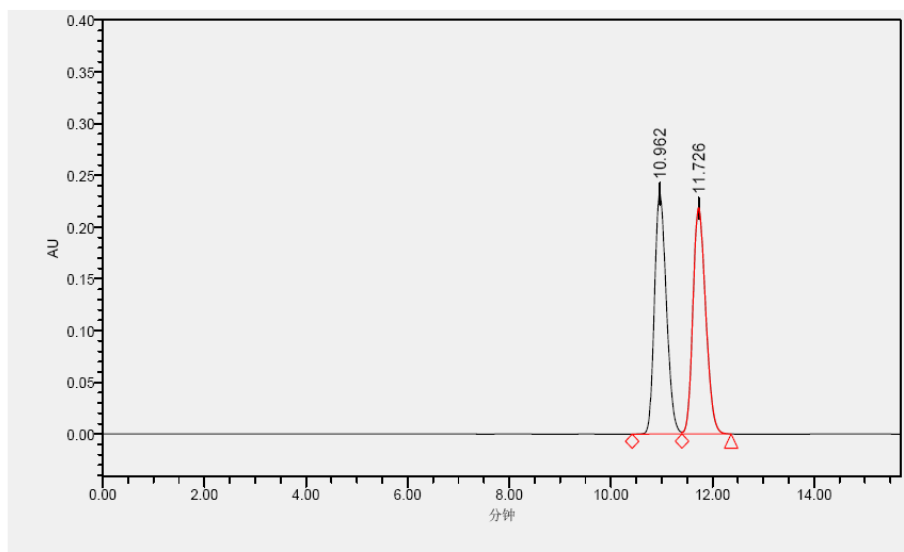

|   | 保留时间   | 面积(微伏*<br>秒) | % 面积  | 高度(微<br>伏) | 积分类型 |
|---|--------|--------------|-------|------------|------|
| 1 | 10.962 | 3789081      | 49.79 | 232824     | VV   |
| 2 | 11.726 | 3821766      | 50.21 | 218664     | Vb   |

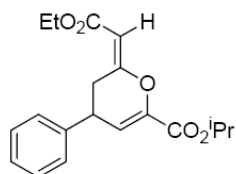

Chiralcel AD-H,  
hexane/iPrOH = 95/5,  
0.6 mL/min, 254nm

Column: AD-H  
Velocity(ml/min): 0.6 ml/min

Mobile Phase: hexane/PrOH = 95/5  
Detection Wavelength(nm): 254 nm

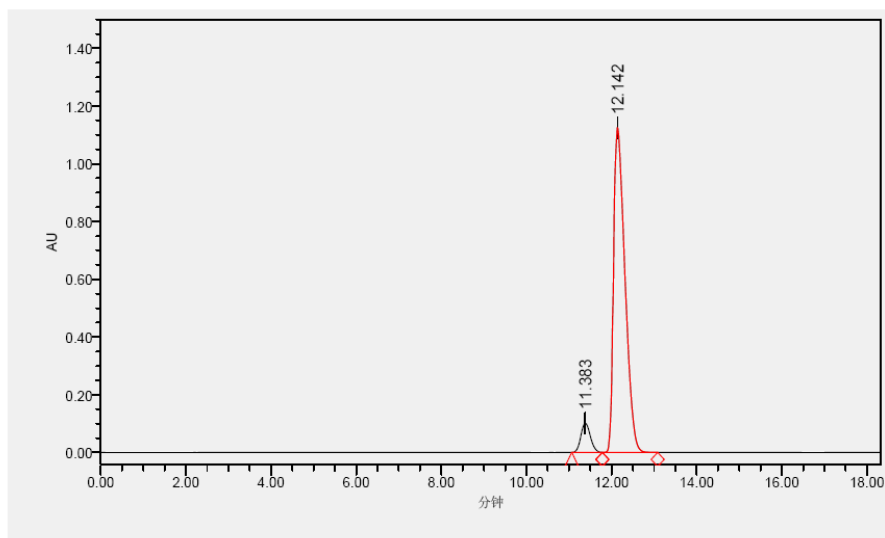

|   | 保留时间   | 面积(微伏*<br>秒) | % 面积  | 高度(微<br>伏) | 积分类型 |
|---|--------|--------------|-------|------------|------|
| 1 | 11.383 | 1572401      | 7.00  | 101620     | bv   |
| 2 | 12.142 | 20882048     | 93.00 | 1127223    | vV   |

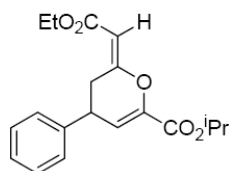

Chiralcel AD-H,  
hexane/PrOH = 95/5,  
0.6 mL/min, 254nm

Column: AD-H  
Velocity(ml/min): 0.7 ml/min

Mobile Phase: hexane/PrOH = 90/10  
Detection Wavelength(nm): 254 nm

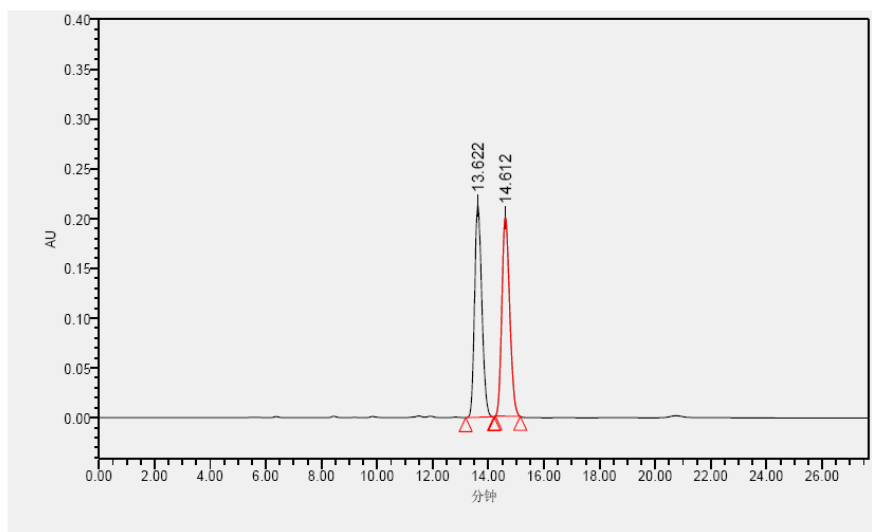

|   | 保留时间   | 面积(微伏*<br>秒) | % 面积  | 高度(微<br>伏) | 积分类型 |
|---|--------|--------------|-------|------------|------|
| 1 | 13.622 | 3857696      | 49.73 | 212963     | bb   |
| 2 | 14.612 | 3898903      | 50.27 | 199795     | bb   |

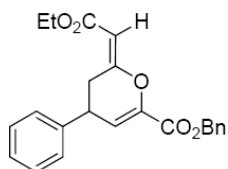

Chiralcel AD-H,  
hexane/PrOH = 90/10,  
0.7 mL/min, 254nm

Column: AD-H  
Velocity(ml/min): 0.7 ml/min

Mobile Phase: hexane/<sup>i</sup>PrOH = 90/10  
Detection Wavelength(nm): 254 nm

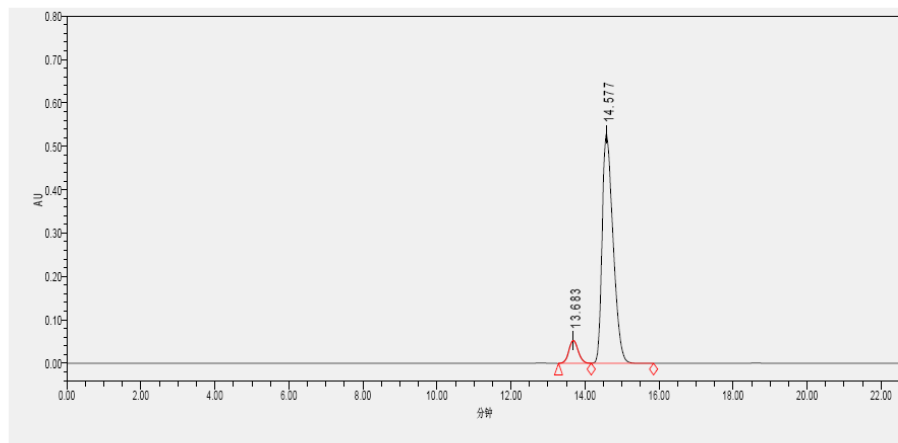

|   | 保留时间   | 面积(微伏*<br>秒) | % 面积  | 高度(微<br>伏) | 积分类型 |
|---|--------|--------------|-------|------------|------|
| 1 | 13.683 | 903727       | 7.71  | 52207      | bV   |
| 2 | 14.577 | 10810450     | 92.29 | 527954     | VV   |

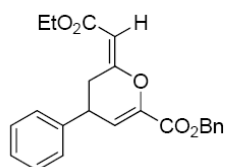

Chiralcel AD-H,  
hexane/<sup>i</sup>PrOH = 90/10,  
0.7 mL/min, 254nm

Column: IC  
Velocity(ml/min): 0.6 ml/min

Mobile Phase: hexane/PrOH = 95/5  
Detection Wavelength(nm): 254 nm

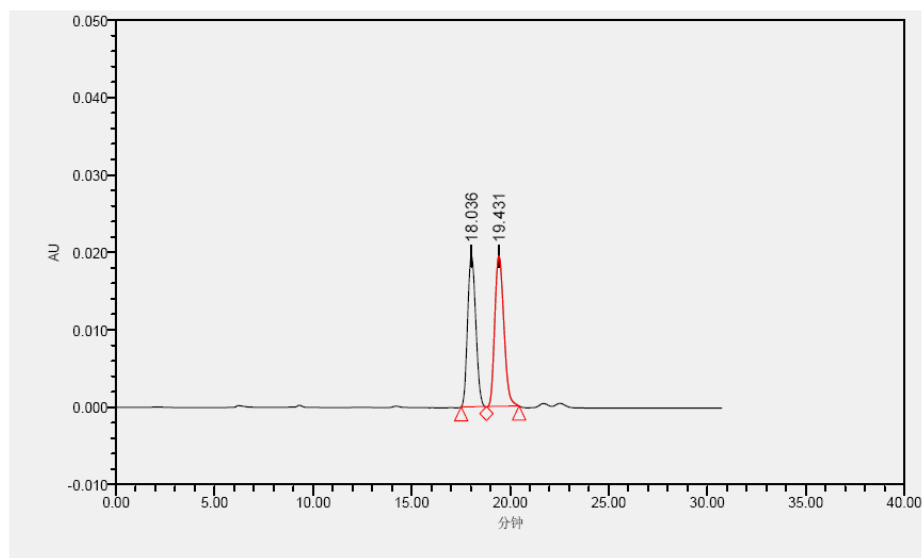

|   | 保留时间   | 面积(微伏*<br>秒) | % 面积  | 高度(微<br>伏) | 积分类型 |
|---|--------|--------------|-------|------------|------|
| 1 | 18.036 | 573150       | 49.91 | 19582      | bb   |
| 2 | 19.431 | 575158       | 50.09 | 18828      | bb   |

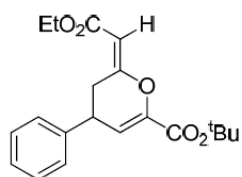

Chiralcel IC,  
hexane/PrOH = 95/5,  
0.6 mL/min, 254nm

Column: IC  
Velocity(ml/min): 0.6 ml/min

Mobile Phase: hexane/iPrOH = 95/5  
Detection Wavelength(nm): 254 nm

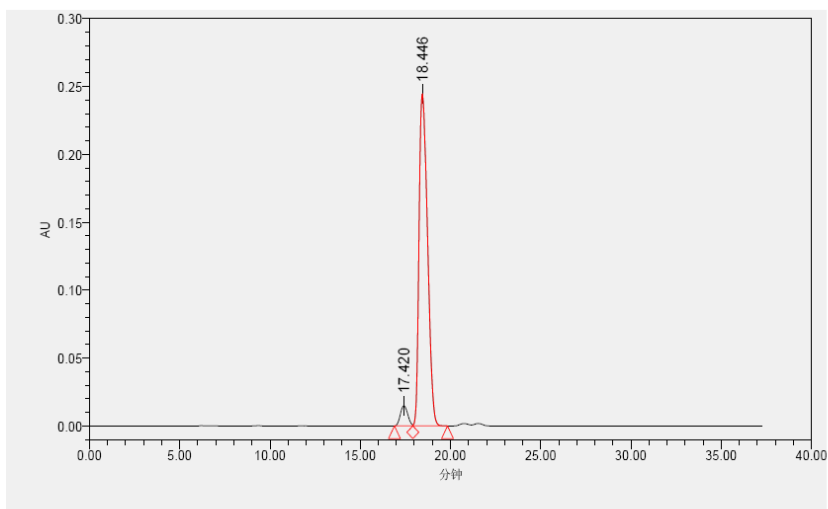

|   | 保留时间   | 面积(微伏*<br>秒) | % 面积  | 高度(微<br>伏) | 积分类型 |
|---|--------|--------------|-------|------------|------|
| 1 | 17.420 | 422007       | 5.06  | 14819      | bV   |
| 2 | 18.446 | 7916837      | 94.94 | 244484     | Vb   |

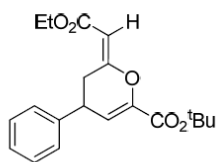

Chiralcel IC,  
hexane/iPrOH = 95/5,  
0.6 mL/min, 254nm

Column: IC  
Velocity(ml/min): 0.6 ml/min

Mobile Phase: hexane/*i*PrOH = 95/5  
Detection Wavelength(nm): 254 nm

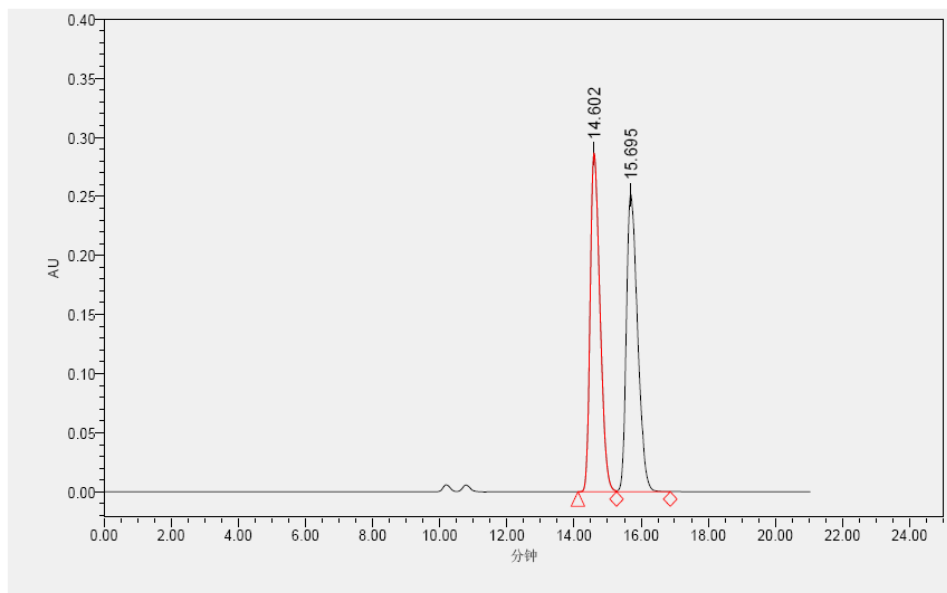

|   | 保留时间   | 面积(微伏*<br>秒) | % 面积  | 高度(微<br>伏) | 积分类型 |
|---|--------|--------------|-------|------------|------|
| 1 | 14.602 | 5850549      | 49.90 | 286740     | BV   |
| 2 | 15.695 | 5873938      | 50.10 | 251662     | VV   |

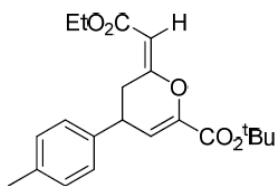

Chiralcel IC,  
hexane/*i*PrOH = 95/5,  
0.6 mL/min, 254nm



Column: IC  
Velocity(ml/min): 0.6 ml/min

Mobile Phase: hexane/*i*PrOH = 95/5  
Detection Wavelength(nm): 254 nm

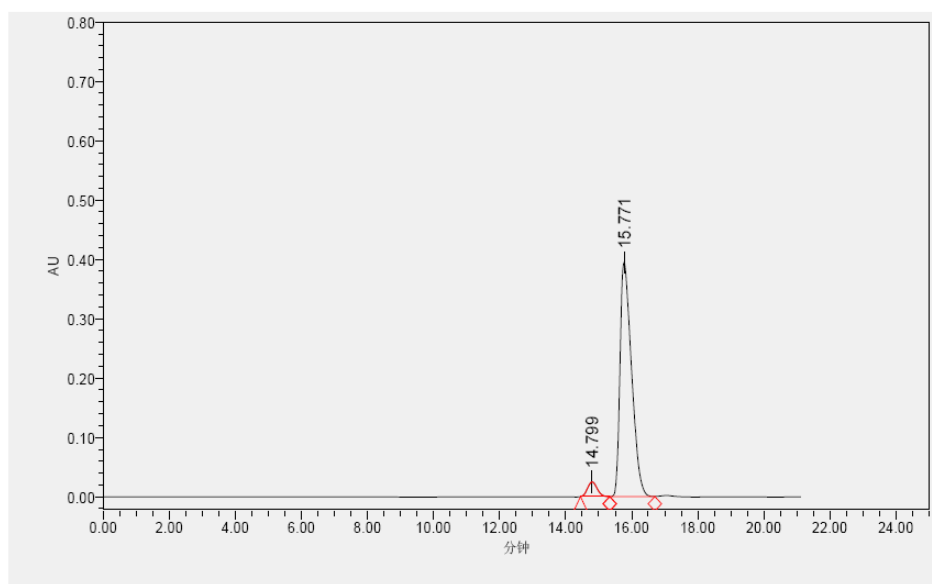

|   | 保留时间   | 面积(微伏*<br>秒) | % 面积  | 高度(微<br>伏) | 积分类型 |
|---|--------|--------------|-------|------------|------|
| 1 | 14.799 | 498280       | 4.96  | 24698      | bV   |
| 2 | 15.771 | 9549895      | 95.04 | 394995     | VV   |

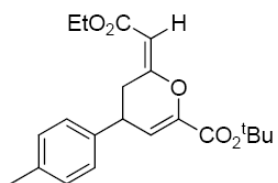

Chiralcel IC,  
hexane/*i*PrOH = 95/5,  
0.6 mL/min, 254nm

Column: AS-H  
Velocity(ml/min): 0.6 ml/min

Mobile Phase: hexane/PrOH = 95/5  
Detection Wavelength(nm): 254 nm

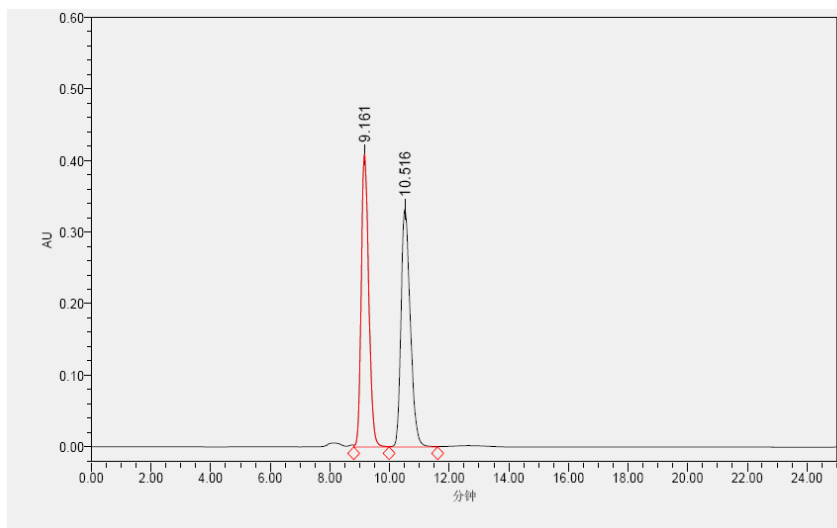

|   | 保留时间   | 面积(微伏*<br>秒) | % 面积  | 高度(微<br>伏) | 积分类型 |
|---|--------|--------------|-------|------------|------|
| 1 | 9.161  | 7180283      | 49.93 | 409037     | VV   |
| 2 | 10.516 | 7201257      | 50.07 | 332433     | VV   |

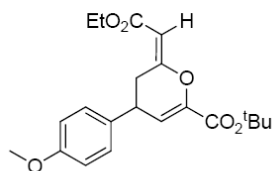

Chiralcel AS-H,  
hexane/PrOH = 95/5,  
0.6 mL/min, 254nm

Column: AS-H  
Velocity(ml/min): 0.6 ml/min

Mobile Phase: hexane/PrOH = 95/5  
Detection Wavelength(nm): 254 nm

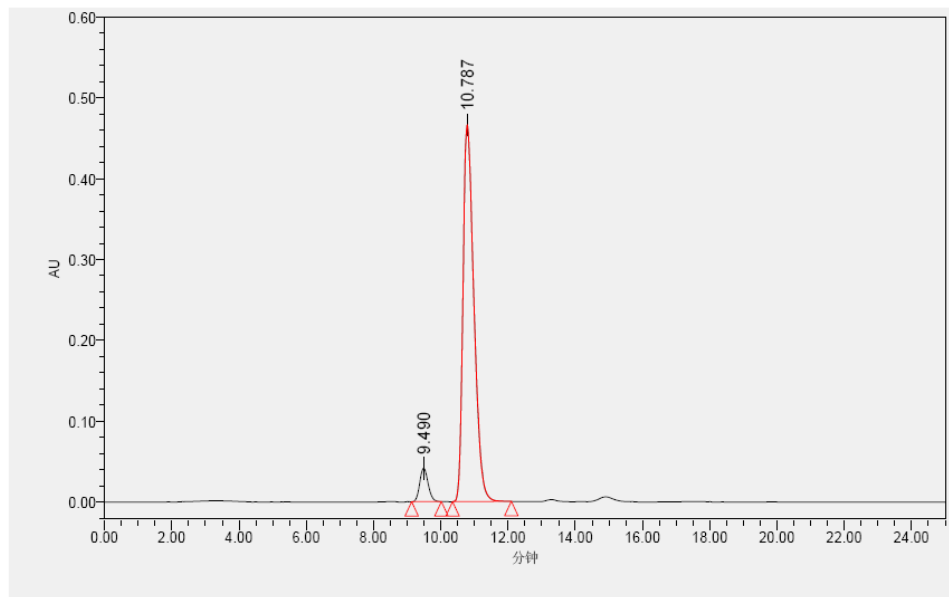

|   | 保留时间   | 面积(微伏*<br>秒) | % 面积  | 高度(微<br>伏) | 积分类型 |
|---|--------|--------------|-------|------------|------|
| 1 | 9.490  | 721007       | 6.43  | 41472      | bb   |
| 2 | 10.787 | 10500874     | 93.57 | 466230     | bb   |

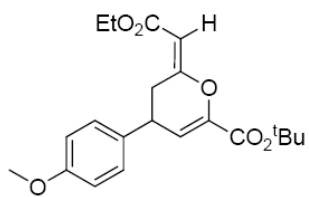

Chiralcel AS-H,  
hexane/PrOH = 95/5,  
0.6 mL/min, 254nm

Column: IC  
Velocity(ml/min): 0.6 ml/min

Mobile Phase: hexane/PrOH = 95/5  
Detection Wavelength(nm): 254 nm

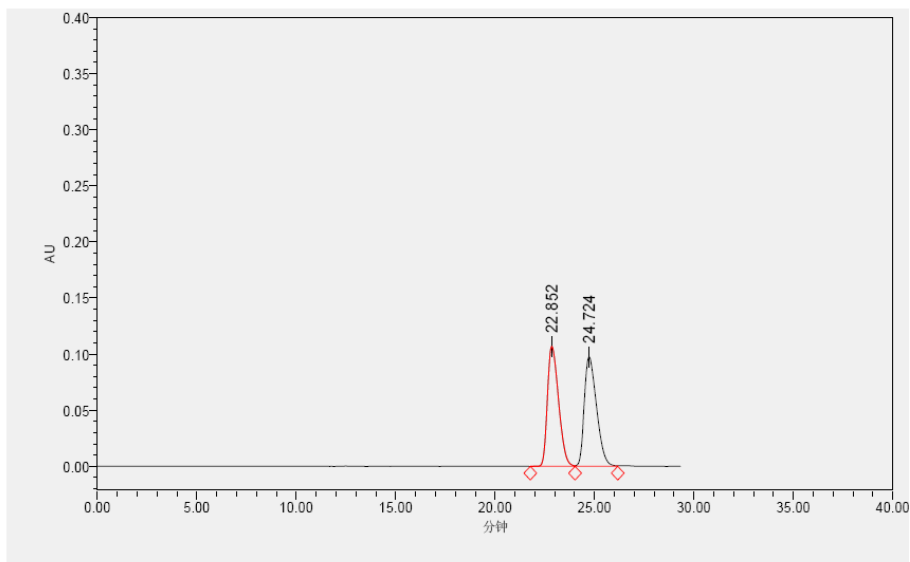

|   | 保留时间   | 面积(微伏*<br>秒) | % 面积  | 高度(微<br>伏) | 积分类型 |
|---|--------|--------------|-------|------------|------|
| 1 | 22.852 | 4168646      | 49.86 | 106815     | VV   |
| 2 | 24.724 | 4191492      | 50.14 | 97523      | VV   |

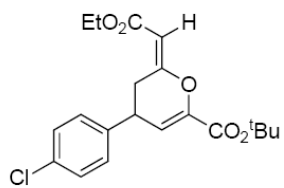

Chiralcel IC,  
hexane/PrOH = 95/5,  
0.6 mL/min, 254nm

Column: IC  
Velocity(ml/min): 0.6 ml/min

Mobile Phase: hexane/<sup>i</sup>PrOH = 95/5  
Detection Wavelength(nm): 254 nm

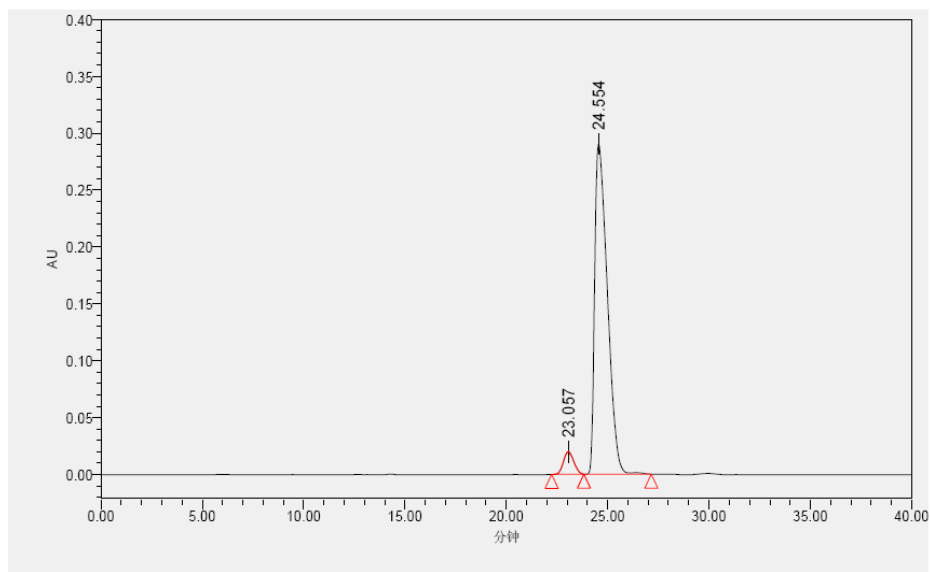

|   | 保留时间   | 面积(微伏*<br>秒) | % 面积  | 高度(微<br>伏) | 积分类型 |
|---|--------|--------------|-------|------------|------|
| 1 | 23.057 | 665351       | 5.01  | 19365      | bb   |
| 2 | 24.554 | 12608500     | 94.99 | 290272     | bb   |

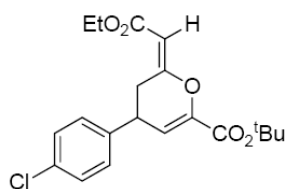

Chiralcel IC,  
hexane/<sup>i</sup>PrOH = 95/5,  
0.6 mL/min, 254nm

Column: IC  
Velocity(ml/min): 0.6 ml/min

Mobile Phase: hexane/iPrOH = 98/2  
Detection Wavelength(nm): 254 nm

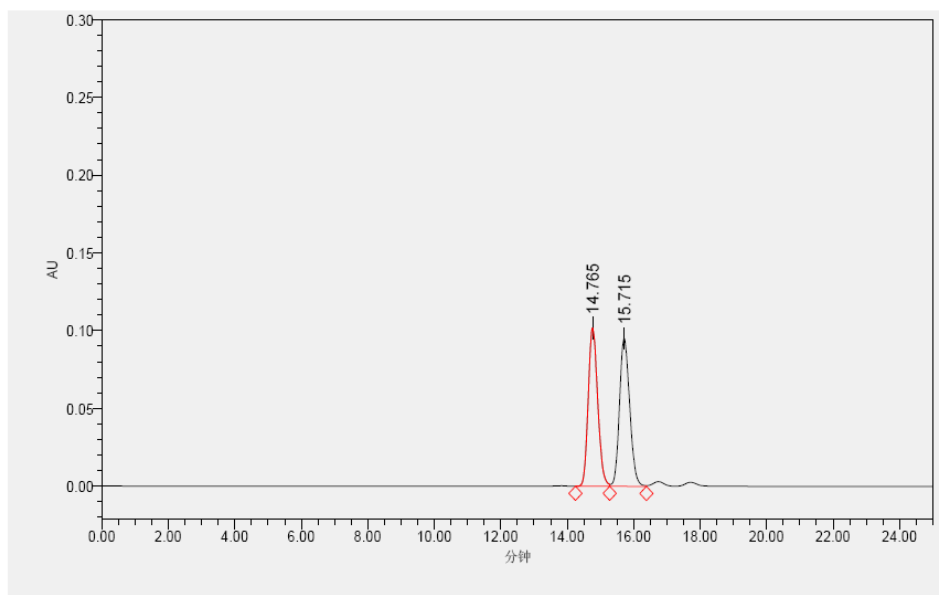

|   | 保留时间   | 面积(微伏*<br>秒) | % 面积  | 高度(微<br>伏) | 积分类型 |
|---|--------|--------------|-------|------------|------|
| 1 | 14.765 | 2023897      | 49.86 | 101967     | Vv   |
| 2 | 15.715 | 2035441      | 50.14 | 95095      | vV   |

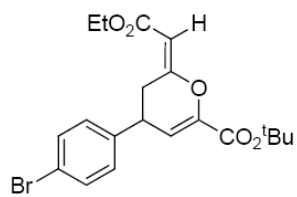

Chiralcel IC,  
hexane/iPrOH = 98/2,  
0.6 mL/min, 254nm

Column: IC  
Velocity(ml/min): 0.6 ml/min

Mobile Phase: hexane/*i*PrOH = 98/2  
Detection Wavelength(nm): 254 nm

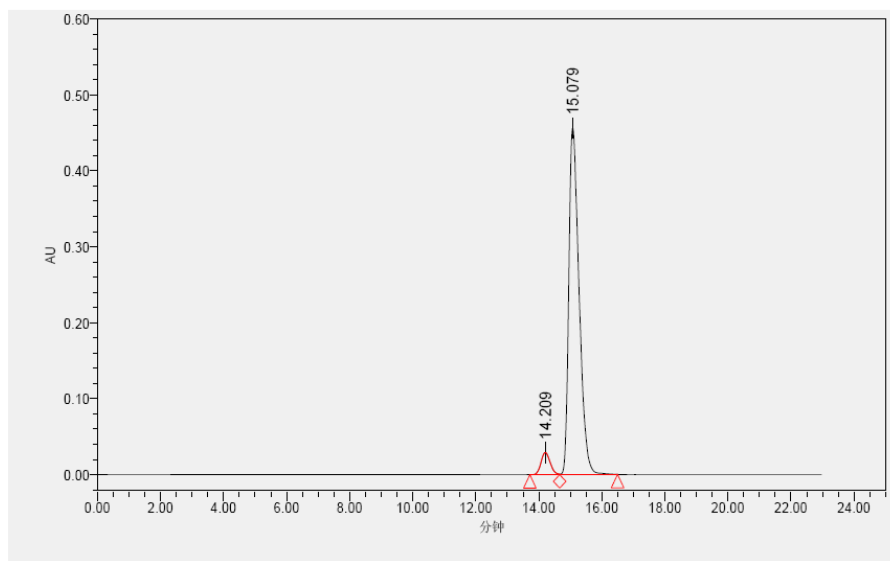

|   | 保留时间   | 面积(微伏*<br>秒) | % 面积  | 高度(微<br>伏) | 积分类型 |
|---|--------|--------------|-------|------------|------|
| 1 | 14.209 | 526670       | 4.88  | 27867      | bv   |
| 2 | 15.079 | 10256857     | 95.12 | 455466     | vb   |

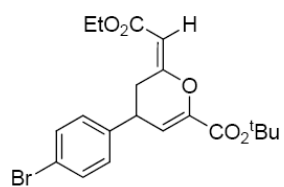

Chiralcel IC,  
hexane/*i*PrOH = 98/2,  
0.6 mL/min, 254 nm

Column: AS-H

Velocity(ml/min): 0.6 ml/min

Mobile Phase: hexane/<sup>i</sup>PrOH = 98/2

Detection Wavelength(nm): 254 nm

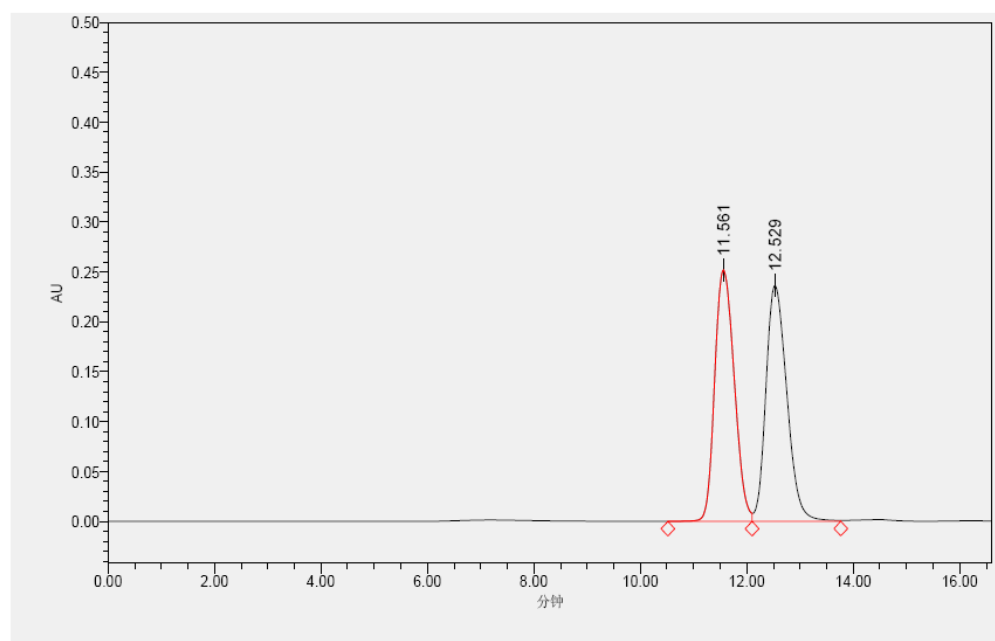

|   | 保留时间   | 面积(微伏*<br>秒) | % 面积  | 高度(微<br>伏) | 积分类型 |
|---|--------|--------------|-------|------------|------|
| 1 | 11.561 | 6420633      | 49.83 | 251812     | VV   |
| 2 | 12.529 | 6464925      | 50.17 | 236265     | VV   |

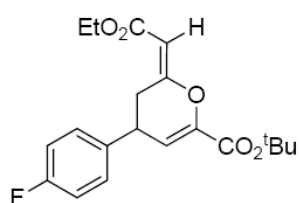

Chiralcel AS-H,  
hexane/<sup>i</sup>PrOH = 98/2,  
0.6 mL/min, 254nm



Column: AS-H  
Velocity(ml/min): 0.6 ml/min

Mobile Phase: hexane/PrOH = 98/2  
Detection Wavelength(nm): 254 nm

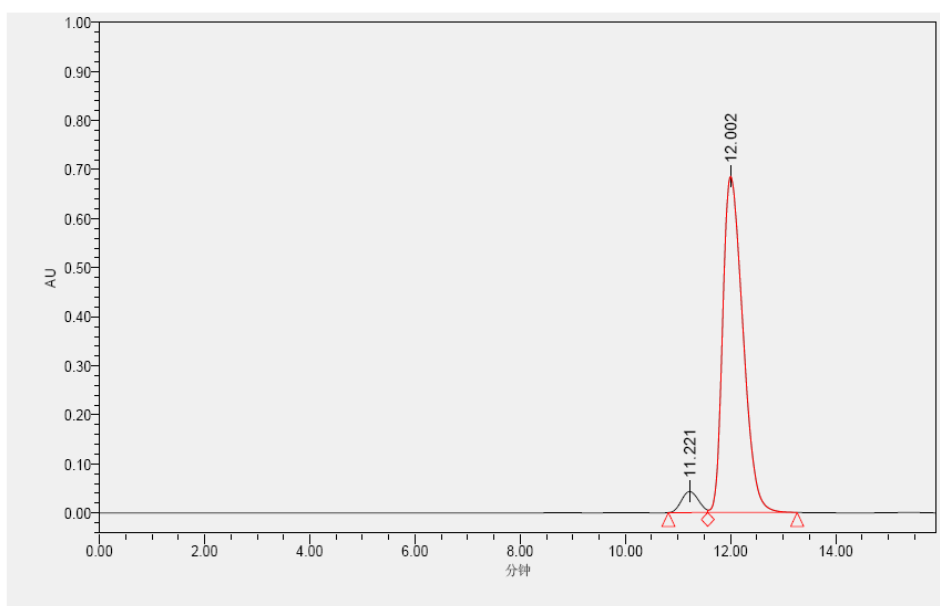

|   | 保留时间   | 面积(微伏*<br>秒) | % 面积  | 高度(微<br>伏) | 积分类型 |
|---|--------|--------------|-------|------------|------|
| 1 | 11.221 | 963656       | 5.02  | 42871      | bv   |
| 2 | 12.002 | 18240354     | 94.98 | 685110     | vb   |

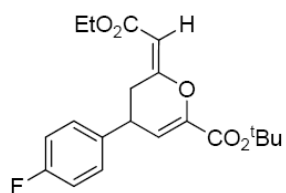

Chiralcel AS-H,  
hexane/PrOH = 98/2,  
0.6 mL/min, 254nm

Column: IC  
Velocity(ml/min): 0.6 ml/min

Mobile Phase: hexane/*i*PrOH = 98/2  
Detection Wavelength(nm): 254 nm

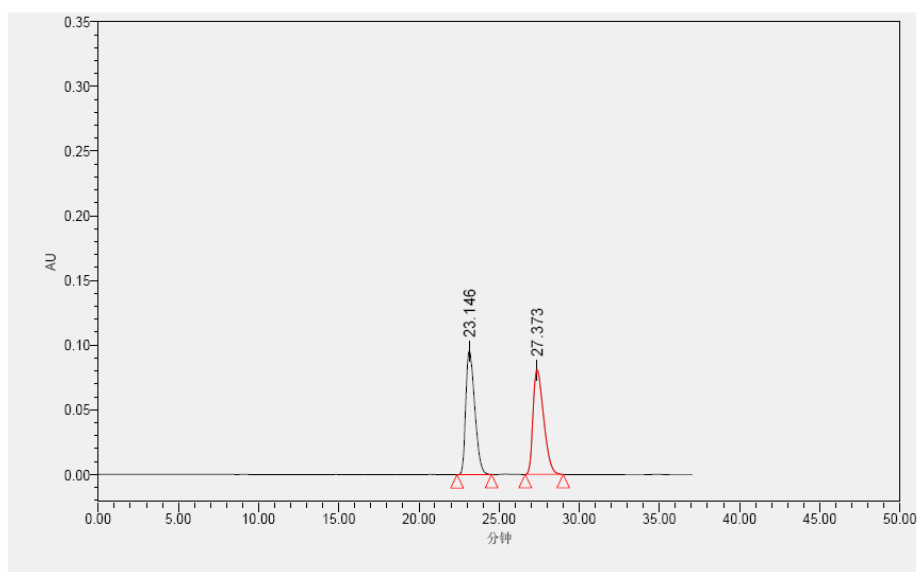

|   | 保留时间   | 面积(微伏*<br>秒) | % 面积  | 高度(微<br>伏) | 积分类型 |
|---|--------|--------------|-------|------------|------|
| 1 | 23.146 | 3723269      | 49.98 | 95706      | bb   |
| 2 | 27.373 | 3725652      | 50.02 | 80835      | bb   |

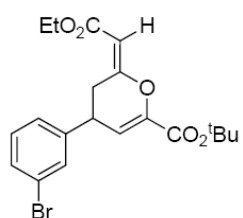

Chiralcel IC,  
hexane/*i*PrOH = 98/2,  
0.6 mL/min, 254nm

Column: IC  
Velocity(ml/min): 0.6 ml/min

Mobile Phase: hexane/iPrOH = 98/2  
Detection Wavelength(nm): 254 nm

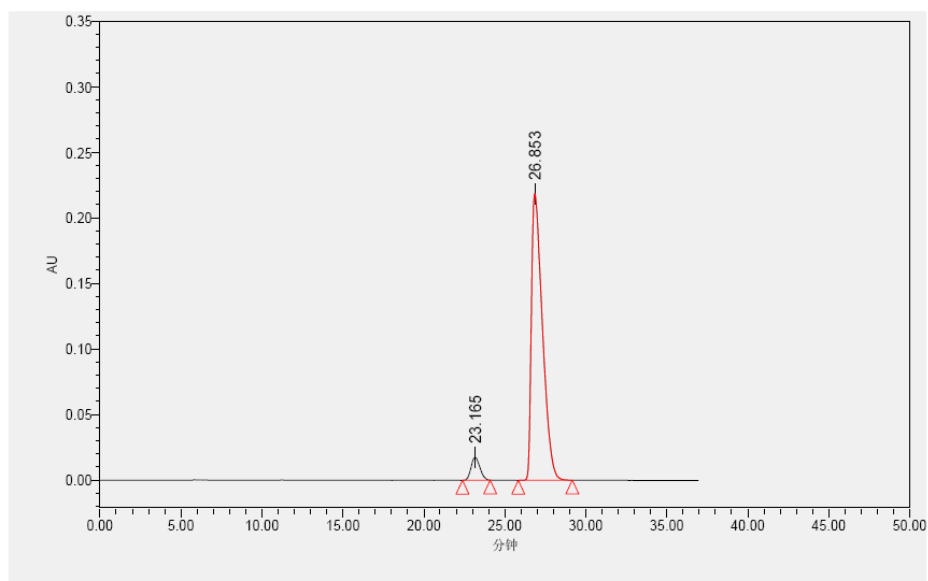

|   | 保留时间   | 面积(微伏*<br>秒) | % 面积  | 高度(微<br>伏) | 积分类型 |
|---|--------|--------------|-------|------------|------|
| 1 | 23.165 | 657598       | 5.99  | 17356      | bb   |
| 2 | 26.853 | 10329126     | 94.01 | 218505     | bb   |

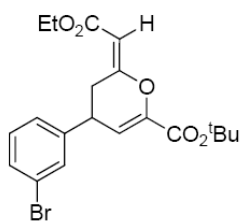

Chiralcel IC,  
hexane/iPrOH = 98/2,  
0.6 mL/min, 254nm

Column: IC  
Velocity(ml/min): 0.6 ml/min

Mobile Phase: hexane/iPrOH = 98/2  
Detection Wavelength(nm): 254 nm

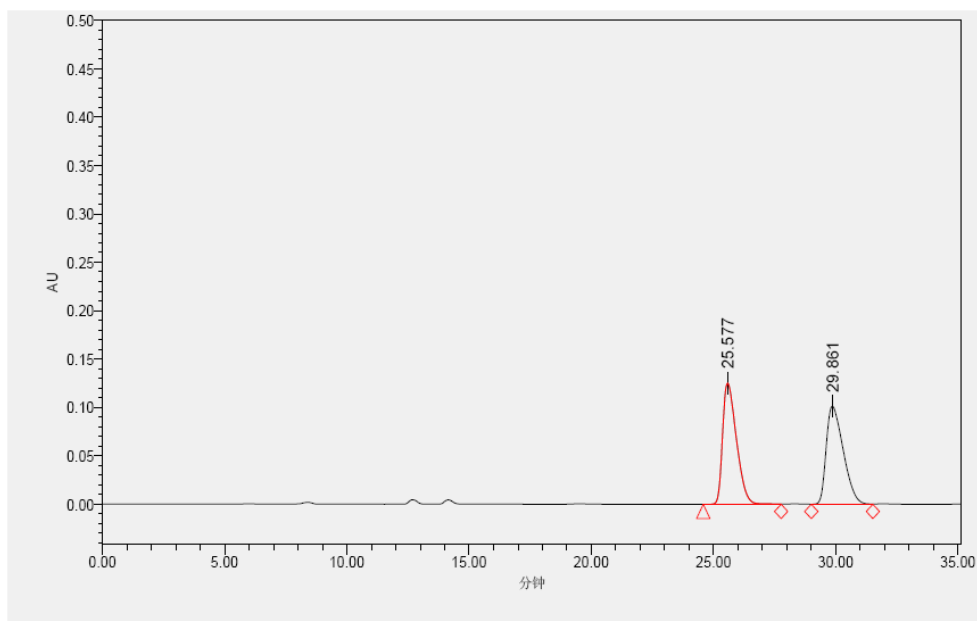

|   | 保留时间   | 面积(微伏*<br>秒) | % 面积  | 高度(微<br>伏) | 积分类型 |
|---|--------|--------------|-------|------------|------|
| 1 | 25.577 | 4924180      | 50.08 | 125090     | BV   |
| 2 | 29.861 | 4908031      | 49.92 | 101349     | VV   |

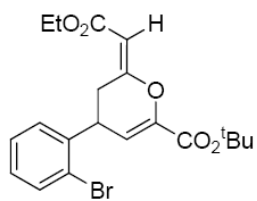

Chiralcel IC,  
hexane/iPrOH = 98/2,  
0.6 mL/min, 254nm

Column: IC  
Velocity(ml/min): 0.6 ml/min

Mobile Phase: hexane/PrOH = 98/2  
Detection Wavelength(nm): 254 nm

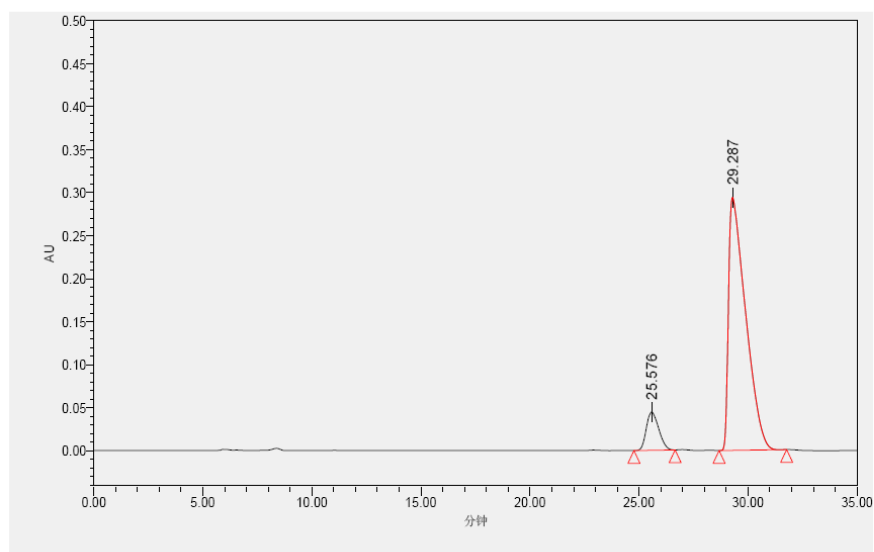

|   | 保留时间   | 面积(微伏*<br>秒) | % 面积  | 高度(微<br>伏) | 积分类型 |
|---|--------|--------------|-------|------------|------|
| 1 | 25.576 | 1764572      | 9.92  | 44449      | bb   |
| 2 | 29.287 | 16019850     | 90.08 | 294229     | bb   |

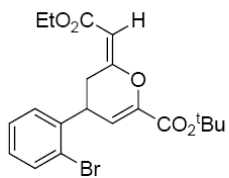

Chiralcel IC,  
hexane/PrOH = 98/2,  
0.6 mL/min, 254nm

Column: IC  
Velocity(ml/min): 0.6 ml/min

Mobile Phase: hexane/PrOH = 98/2  
Detection Wavelength(nm): 254 nm

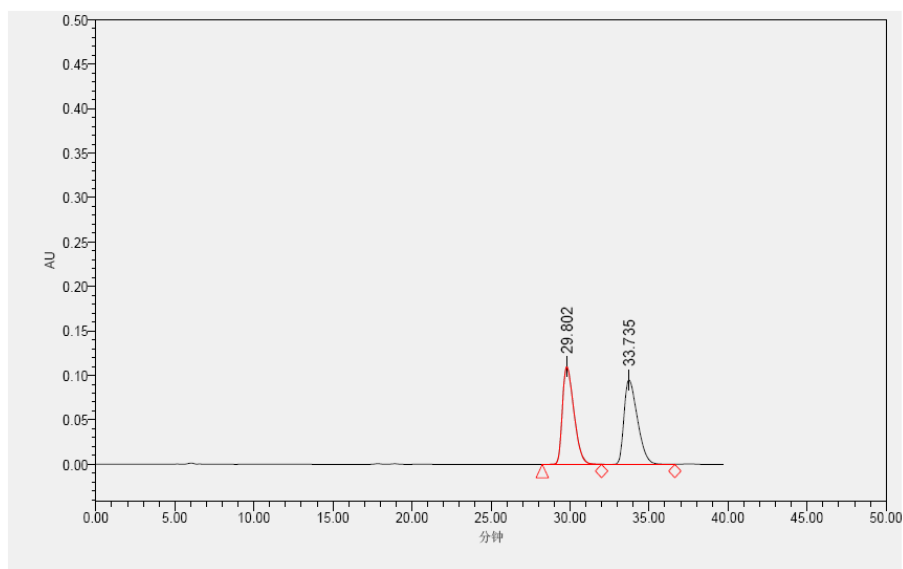

|   | 保留时间   | 面积(微伏*<br>秒) | % 面积  | 高度(微<br>伏) | 积分类型 |
|---|--------|--------------|-------|------------|------|
| 1 | 29.802 | 5590029      | 49.82 | 109643     | Bv   |
| 2 | 33.735 | 5630792      | 50.18 | 94989      | vV   |

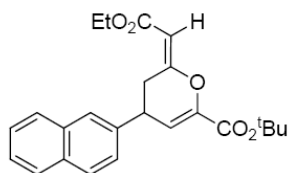

Chiralcel IC,  
hexane/PrOH = 98/2,  
0.6 mL/min, 254nm

Column: IC  
Velocity(ml/min): 0.6 ml/min

Mobile Phase: hexane/iPrOH = 98/2  
Detection Wavelength(nm): 254 nm

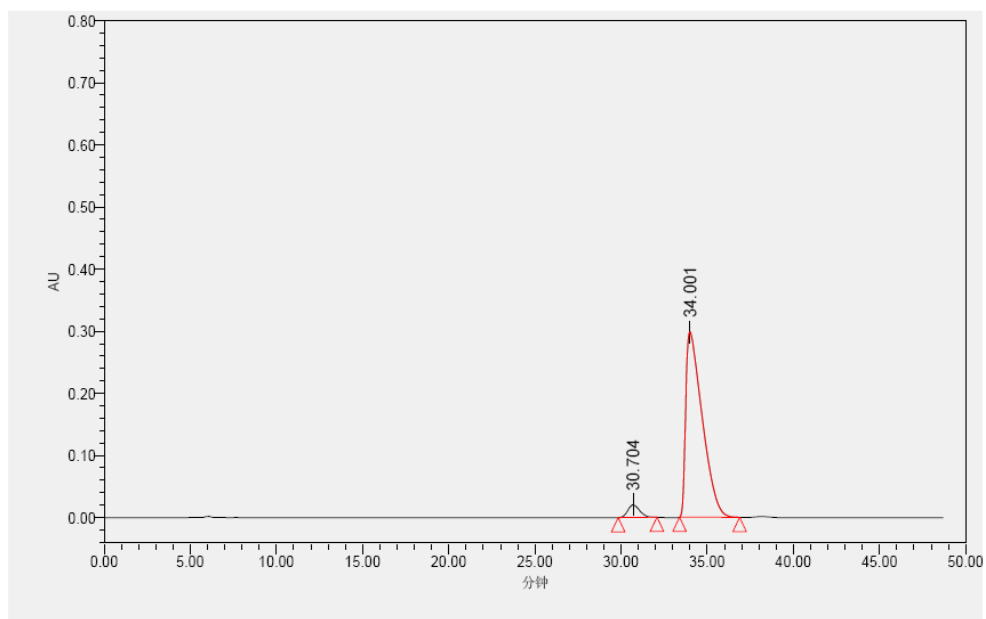

|   | 保留时间   | 面积(微伏*<br>秒) | % 面积  | 高度(微<br>伏) | 积分类型 |
|---|--------|--------------|-------|------------|------|
| 1 | 30.704 | 953895       | 4.59  | 20143      | bb   |
| 2 | 34.001 | 19809469     | 95.41 | 298417     | bb   |

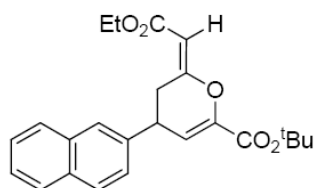

Chiralcel IC,  
hexane/iPrOH = 98/2,  
0.6 mL/min, 254nm

Column: IC

Velocity(ml/min): 0.6 ml/min

Mobile Phase: hexane/*i*PrOH = 98/2

Detection Wavelength(nm): 254 nm

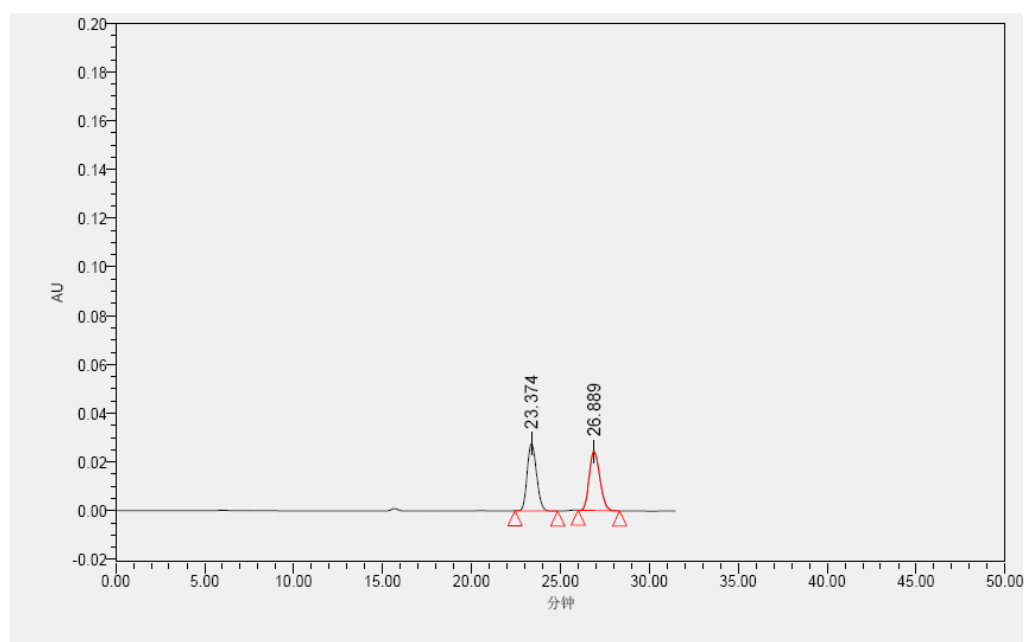

|   | 保留时间   | 面积(微伏*<br>秒) | % 面积  | 高度(微<br>伏) | 积分类型 |
|---|--------|--------------|-------|------------|------|
| 1 | 23.374 | 1008256      | 50.03 | 27633      | bb   |
| 2 | 26.889 | 1007099      | 49.97 | 24112      | bb   |

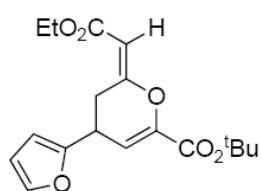

Chiralcel IC,  
hexane/*i*PrOH = 98/2,  
0.6 mL/min, 254nm



Column: IC  
Velocity(ml/min): 0.6 ml/min

Mobile Phase: hexane/iPrOH = 98/2  
Detection Wavelength(nm): 254 nm

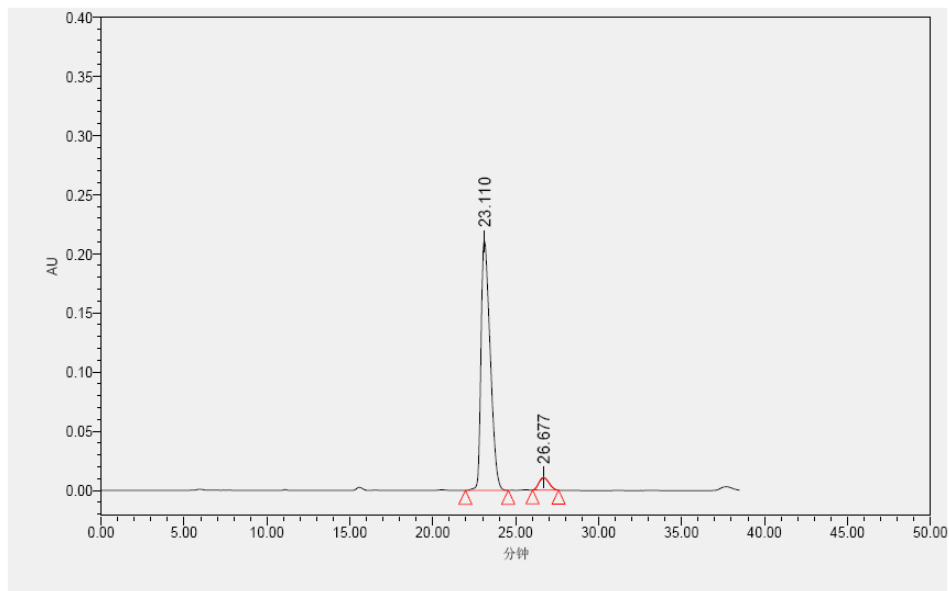

|   | 保留时间   | 面积(微伏*<br>秒) | % 面积  | 高度(微<br>伏) | 积分类型 |
|---|--------|--------------|-------|------------|------|
| 1 | 23.110 | 8120045      | 94.81 | 210832     | bb   |
| 2 | 26.677 | 444430       | 5.19  | 10564      | bb   |

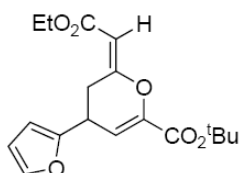

Chiralcel IC,  
hexane/iPrOH = 98/2,  
0.6 mL/min, 254nm

Column: IC  
Velocity(ml/min): 0.6 ml/min

Mobile Phase: hexane/<sup>i</sup>PrOH = 98/2  
Detection Wavelength(nm): 254 nm

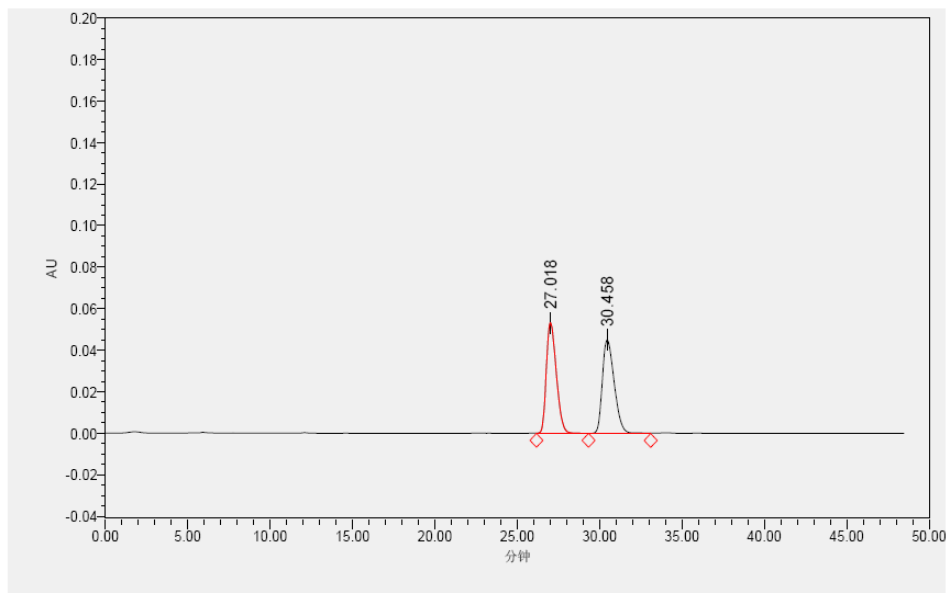

|   | 保留时间   | 面积(微伏*<br>秒) | % 面积  | 高度(微<br>伏) | 积分类型 |
|---|--------|--------------|-------|------------|------|
| 1 | 27.018 | 2254744      | 49.88 | 53349      | VV   |
| 2 | 30.458 | 2265615      | 50.12 | 45053      | VV   |

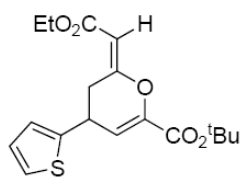

Chiralcel IC,  
hexane/<sup>i</sup>PrOH = 98/2,  
0.6 mL/min, 254nm

Column: IC  
Velocity(ml/min): 0.6 ml/min

Mobile Phase: hexane/*i*PrOH = 98/2  
Detection Wavelength(nm): 254 nm

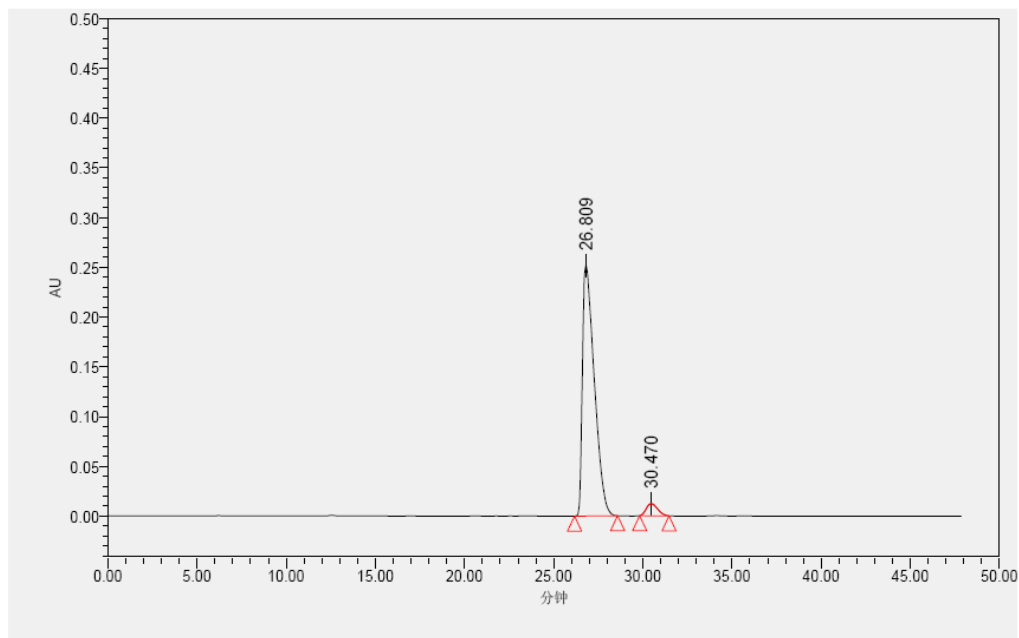

|   | 保留时间   | 面积(微伏*<br>秒) | % 面积  | 高度(微<br>伏) | 积分类型 |
|---|--------|--------------|-------|------------|------|
| 1 | 26.809 | 11662078     | 95.57 | 251889     | bb   |
| 2 | 30.470 | 540826       | 4.43  | 12247      | bb   |

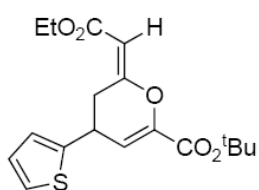

Chiralcel IC,  
hexane/*i*PrOH = 98/2,  
0.6 mL/min, 254nm

Column: OJ-H  
Velocity (ml/min): 0.6 ml/min

Mobile Phase: hexane/<sup>i</sup>PrOH = 98/2  
Detection Wavelength (nm): 254 nm

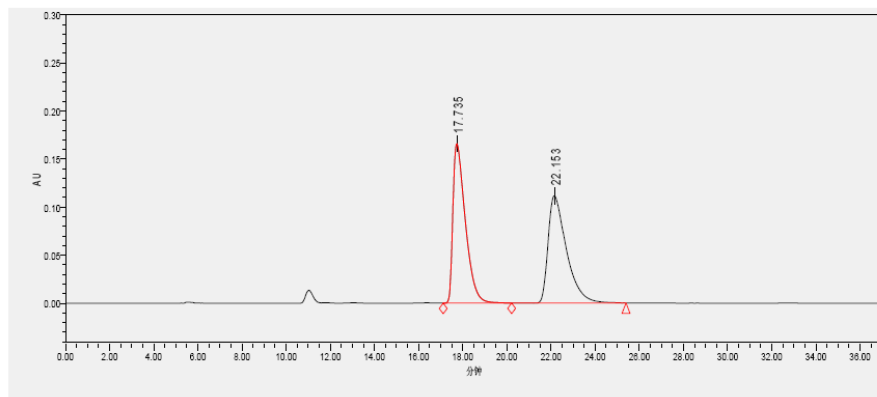

|   | 保留时间   | 面积(微伏*<br>秒) | % 面积  | 高度(微<br>伏) | 积分类型 |
|---|--------|--------------|-------|------------|------|
| 1 | 17.735 | 6483301      | 50.23 | 165758     | Vv   |
| 2 | 22.153 | 6424843      | 49.77 | 111461     | vb   |

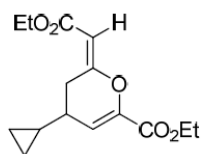

Chiralcel OJ-H,  
hexane/<sup>i</sup>PrOH = 98/2,  
0.6 mL/min, 254 nm

Column: OJ-H  
Velocity (ml/min): 0.6 ml/min

Mobile Phase: hexane/<sup>n</sup>PrOH = 98/2  
Detection Wavelength (nm): 254 nm

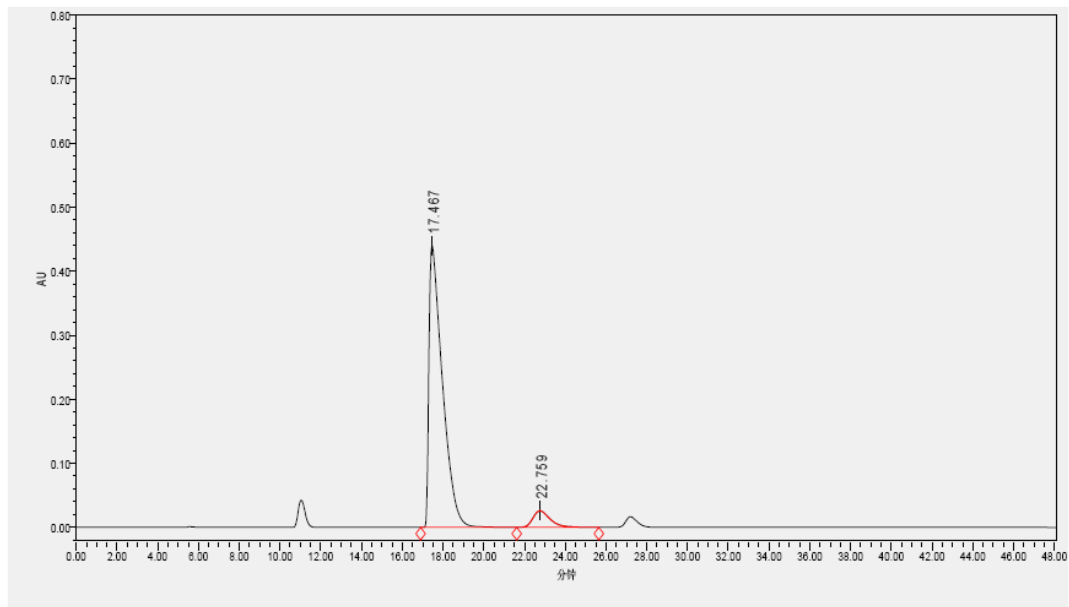

|   | 保留时间   | 面积(微伏*<br>秒) | % 面积  | 高度(微<br>伏) | 积分类型 |
|---|--------|--------------|-------|------------|------|
| 1 | 17.467 | 20219988     | 92.91 | 439973     | VV   |
| 2 | 22.759 | 1543677      | 7.09  | 25938      | VV   |

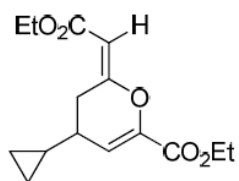

Chiralcel OJ-H,  
hexane/<sup>n</sup>PrOH = 98/2,  
0.6 mL/min, 254 nm

### X-ray Crystal Data of 3na

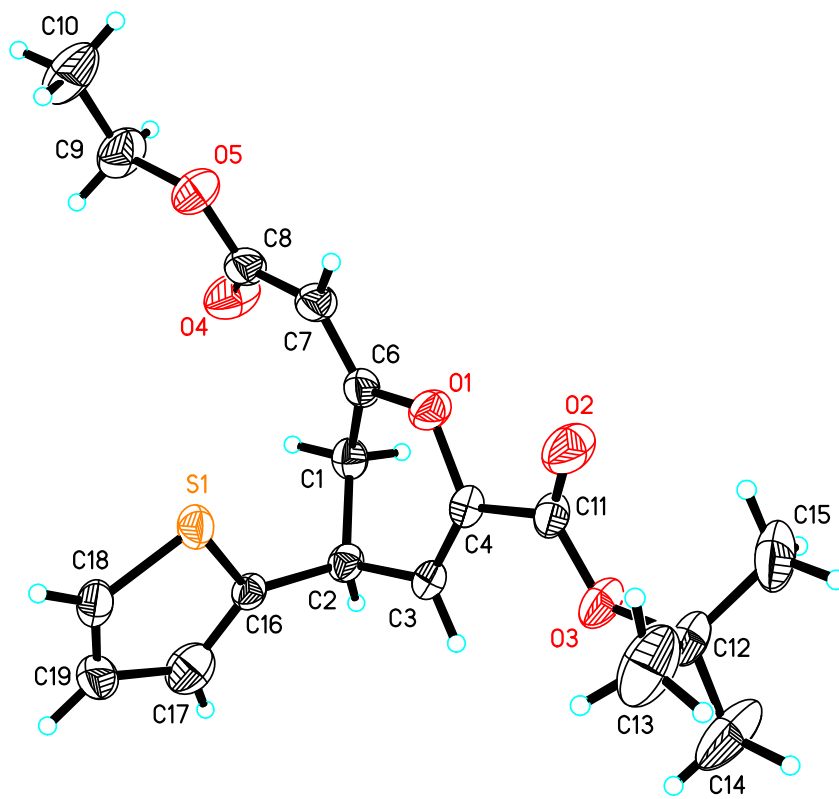

The crystal data of compound **3na** have been deposited in CCDC with number 850472. Empirical Formula:  $C_{18}H_{22}O_5S$ ; Formula Weight: 350.42; Crystal Color, Habit: colorless; Crystal Dimensions: 0.269 x 0.215 x 0.097 mm; Crystal System: Orthorhombic; Lattice Type: Primitive; Lattice Parameters:  $a = 5.5779(5)\text{\AA}$ ,  $b = 10.4276(10)\text{\AA}$ ,  $c = 31.686(3)\text{\AA}$ ,  $\alpha = 90^\circ$ ,  $\beta = 90^\circ$ ,  $\gamma = 90^\circ$ ,  $V = 1843.0(3)\text{\AA}^3$ ; Space group:  $P2(1)2(1)2(1)$ ;  $Z = 4$ ;  $D_{calc} = 1.263\text{ g/cm}^3$ ;  $F_{000} = 744$ ; Final R indices [ $I > 2\sigma(I)$ ]:  $R1 = 0.0447$ ;  $wR2 = 0.1151$ .

Reference:

1. A. Kumar, S. Sharma, V. D. Tripathi, R. A. Maurya, S. P. Srivastava, G. Bhatia, A. K. Tamrakar and A. K. Srivastava, *Bioorg. Med. Chem.*, 2010, **18**, 4138.
2. (a) Y. Liu, B. Sun, B. Wang, M. Wakem and L. Deng, *J. Am. Chem. Soc.*, 2009, **131**, 418; (b) J.-B. Denis, G. Masson, P. Retailleau and J. Zhu, *Angew. Chem., Int. Ed.*, 2011, **50**, 5356; (c) N. Abermil, G. Masson and J. Zhu, *J. Am. Chem. Soc.*, 2008, **130**, 12596. (d) J. Song, Y. Wang and L. Deng, *J. Am. Chem. Soc.*, 2006, **128**, 6048. (e) C.-K. Pei, X.-C. Zhang and M. Shi, *Eur. J. Org. Chem.*, 2011, 4479; (f) C.-K. Pei and M. Shi, *Tetrahedron: Asymmetry*, 2011, **22** 1239.
3. C.-K. Pei, L. Wu, Z. Lian and M. Shi, *Org. Biomol. Chem.*, 2012, **10**, 171.
